# Supplementary material for: Geostationary Observations Reveal Widespread Underestimation of Current Ambient NO2 from Strong Diurnal Variability
Source: Research Square preprint supplement (doi:10.21203/rs.3.rs-7968663/v1), 2025-10-31
Supplement: Supplementary file 1 [file 7472752d7fb04cf14ea3bf86.docx]

**Supplementary Information for**

**Geostationary Observations Reveal Widespread Underestimation of Current Ambient NO2 from Strong Diurnal Variability**

Figures S1-S19

Tables S1-S6

References


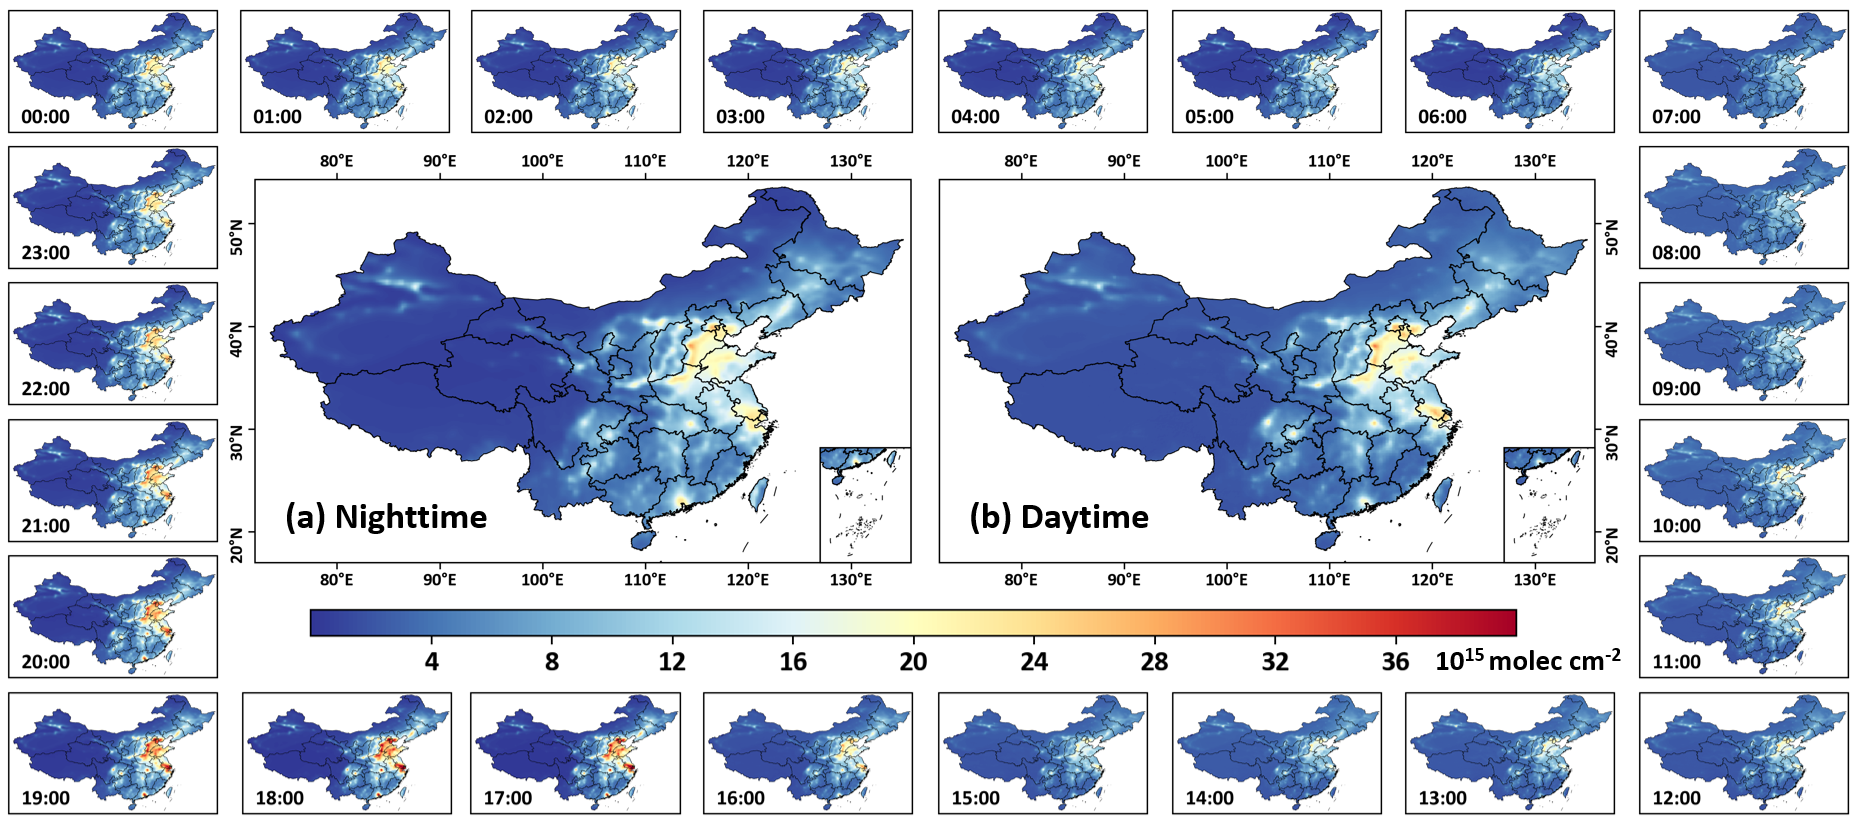


# Fig. S1 | Diurnal variation of tropospheric NO2 across China. Hourly spatial distributions of tropospheric NO2 columns (1015 molec cm-2) across China for 2023. Surrounding subplots show concentrations for each hour of the day (00:00–23:00 China Standard Time, CST), while panels (a) and (b) present maps of average tropospheric NO2 columns during the nighttime (20:00–08:00 CST) and daytime (08:00–20:00 CST), respectively.


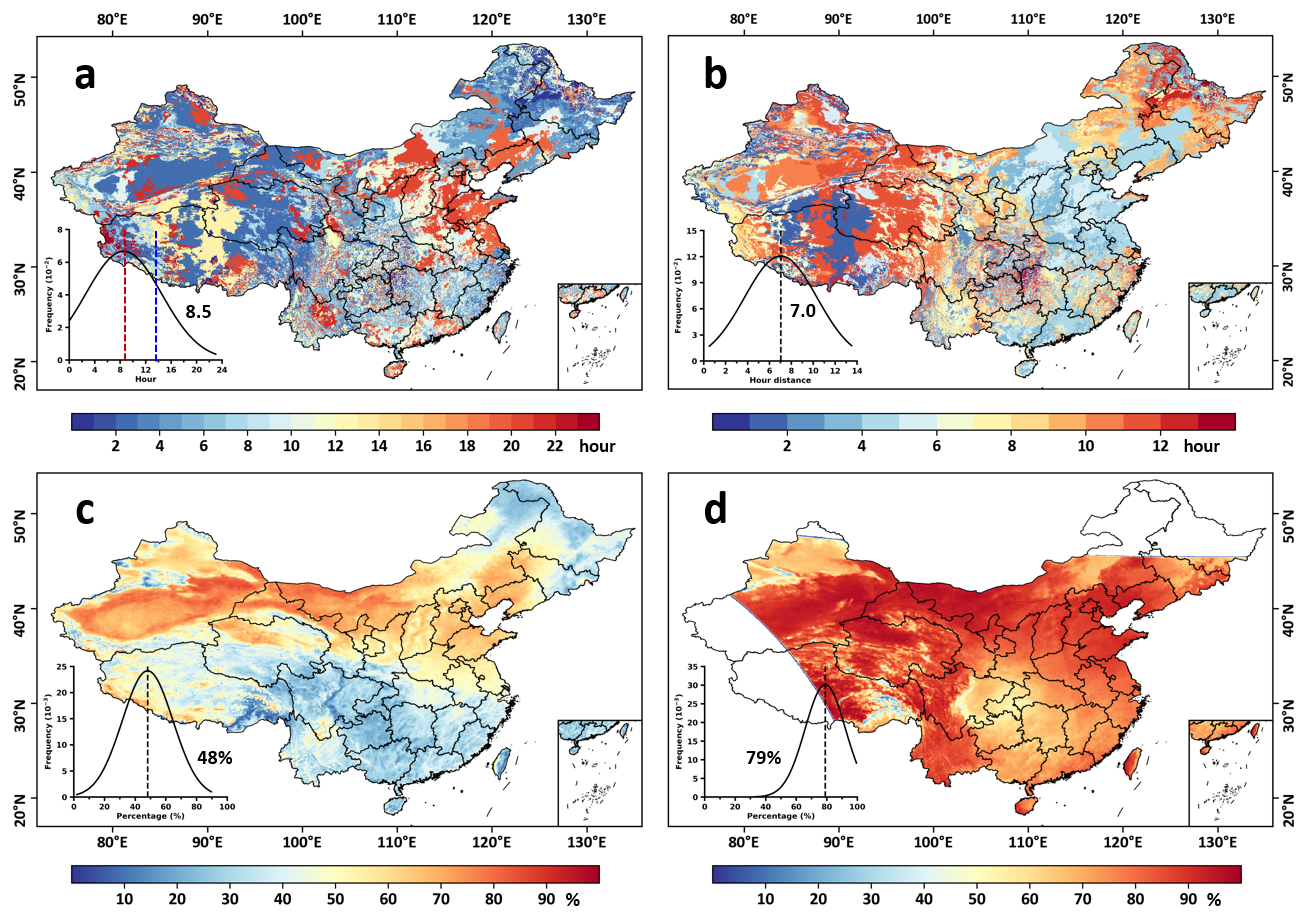


# Fig. S2 | Spatial distributions of the hour of surface NO2 closest to the daily mean and spatial coverage of satellite tropospheric NO2 retrievals in China. Spatial distribution of (a) the hour of surface NO2 that most closely matches the daily mean and (b) its difference from the TROPOMI overpass time (13:30 LT) across China in 2023, along with the spatial coverage (%) in tropospheric NO2 products from (c) GEMS and (d) TROPOMI. Insets show frequency histograms, with black numbers indicating the mean value.

#
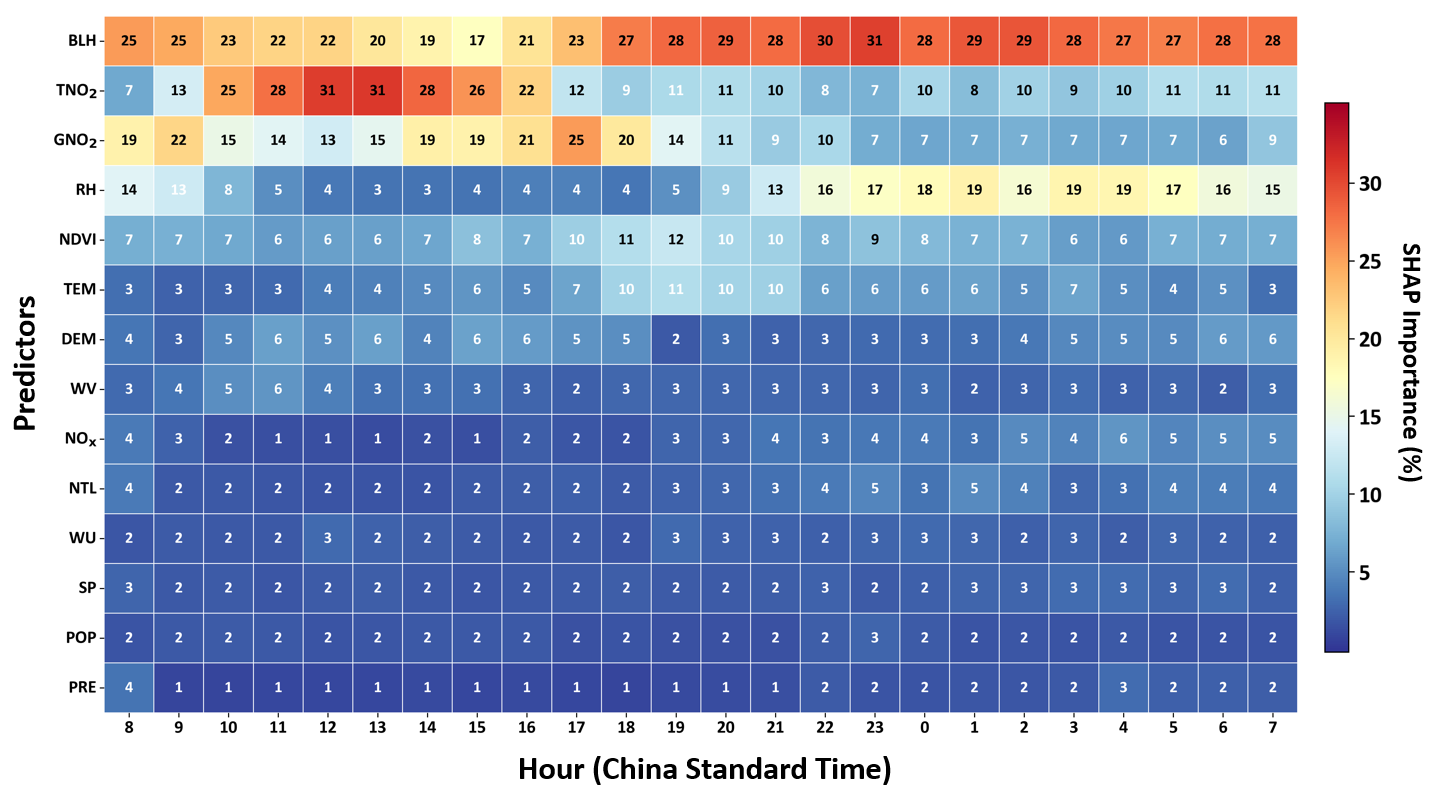
Fig. S3 | Drivers of diurnal variations in ambient NO2 across China. Heatmap showing the hourly percentage contribution of each predictor to the machine learning model output, evaluated by the SHAP (SHapley Additive exPlanations) method.


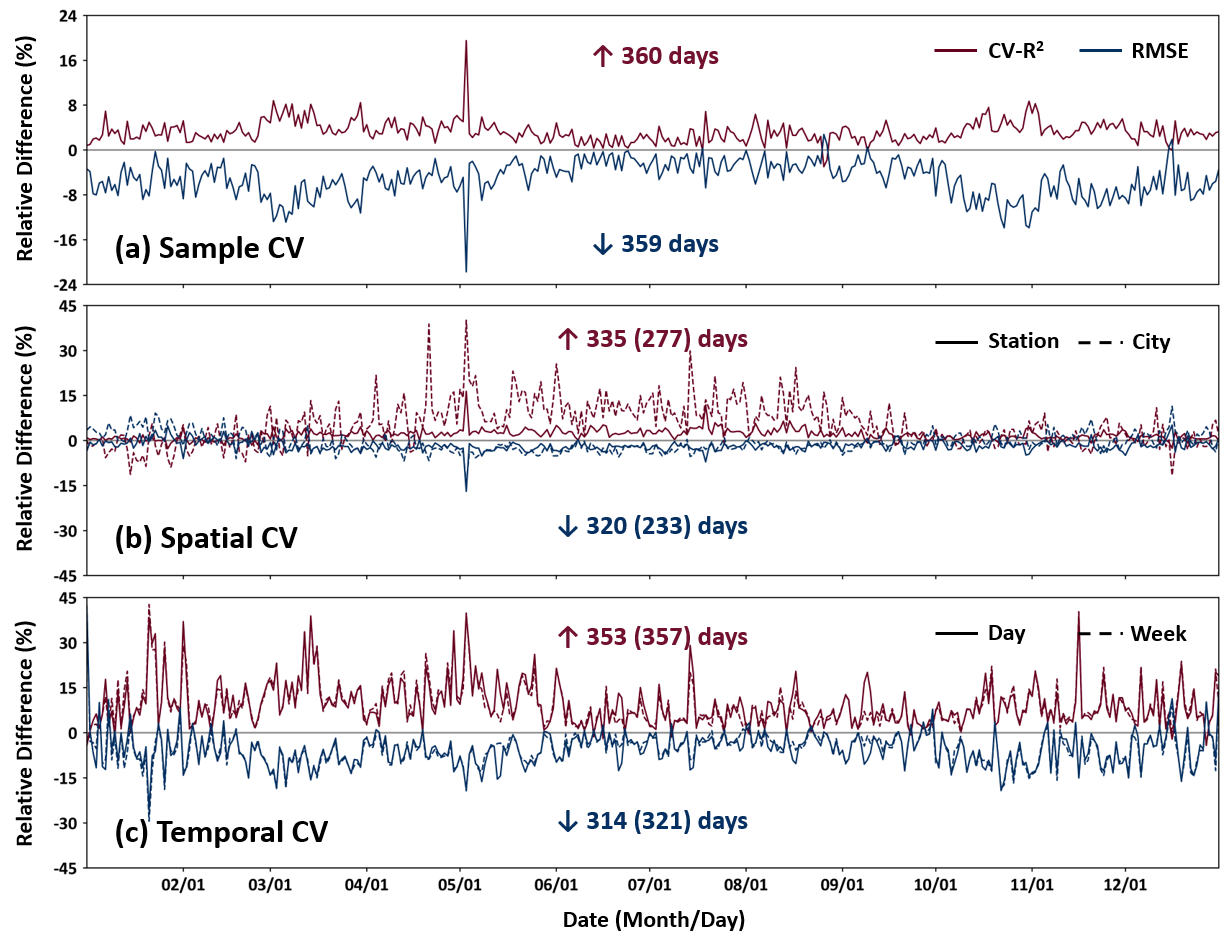


# Fig. S4 | Accuracy comparison of daily NO2 retrievals from GEMS and TROPOMI. Time series of daily improvements in (a) sample-, (b) spatial-, and (c) temporal-based cross-validated coefficient of determination (CV-R2) and root mean square error (RMSE) in China in 2023, comparing GEMS- and TROPOMI-derived daily NO2 retrievals under different cross-validation approaches. Red numbers indicate the number of days with improved CV-R2, and blue numbers indicate days with reduced RMSE.


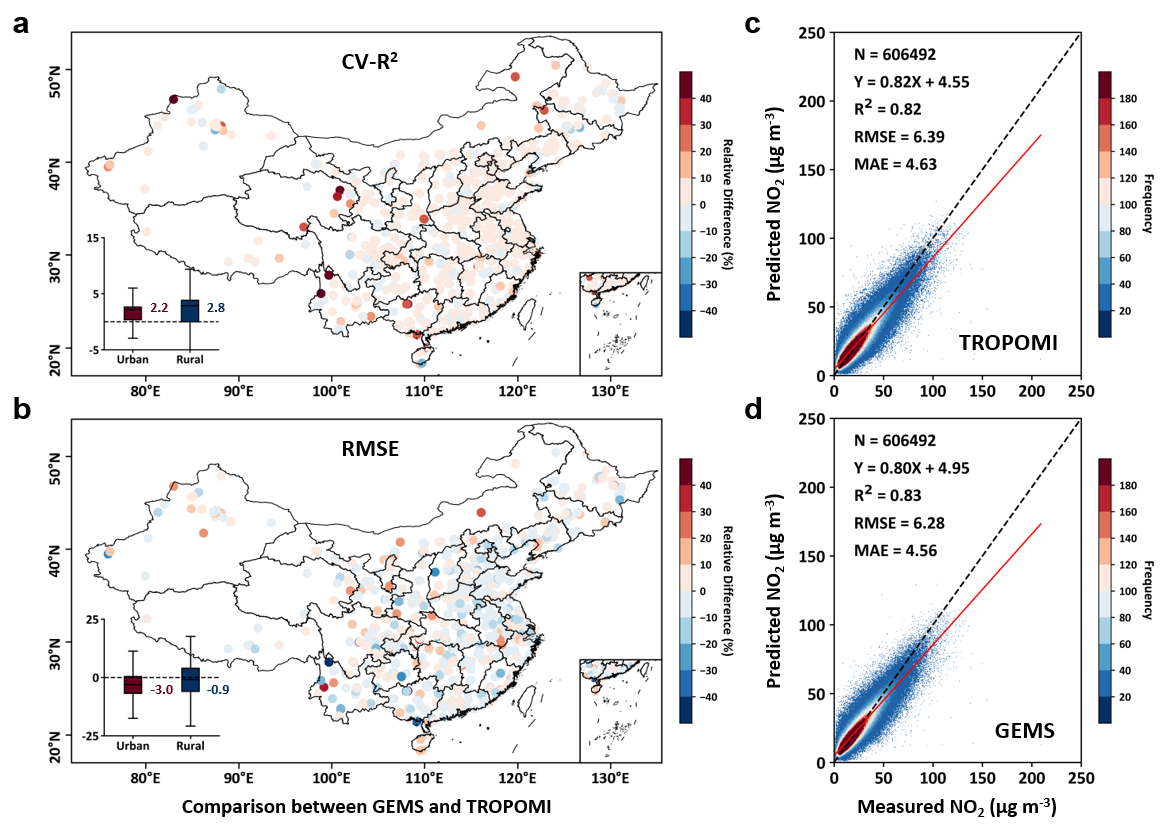


# Fig. S5 | Accuracy comparison of daily NO2 predictions from GEMS and TROPOMI. Spatial improvements (%) in (a) cross-validated coefficient of determination (CV-R2) and (b) root mean square error (RMSE) at each monitoring station across China in 2023, comparing GEMS- and TROPOMI-derived daily ambient NO2 predictions using the station-based 10-fold cross-validation approach. Inset box plots illustrate the improvements in urban and rural areas, with colored numbers indicating the mean relative differences. Panels (c) and (d) show comparisons between predicted and measured daily ambient NO2 concentrations (µg m-3) derived from (c) TROPOMI and (d) GEMS observations across all monitoring stations in China.


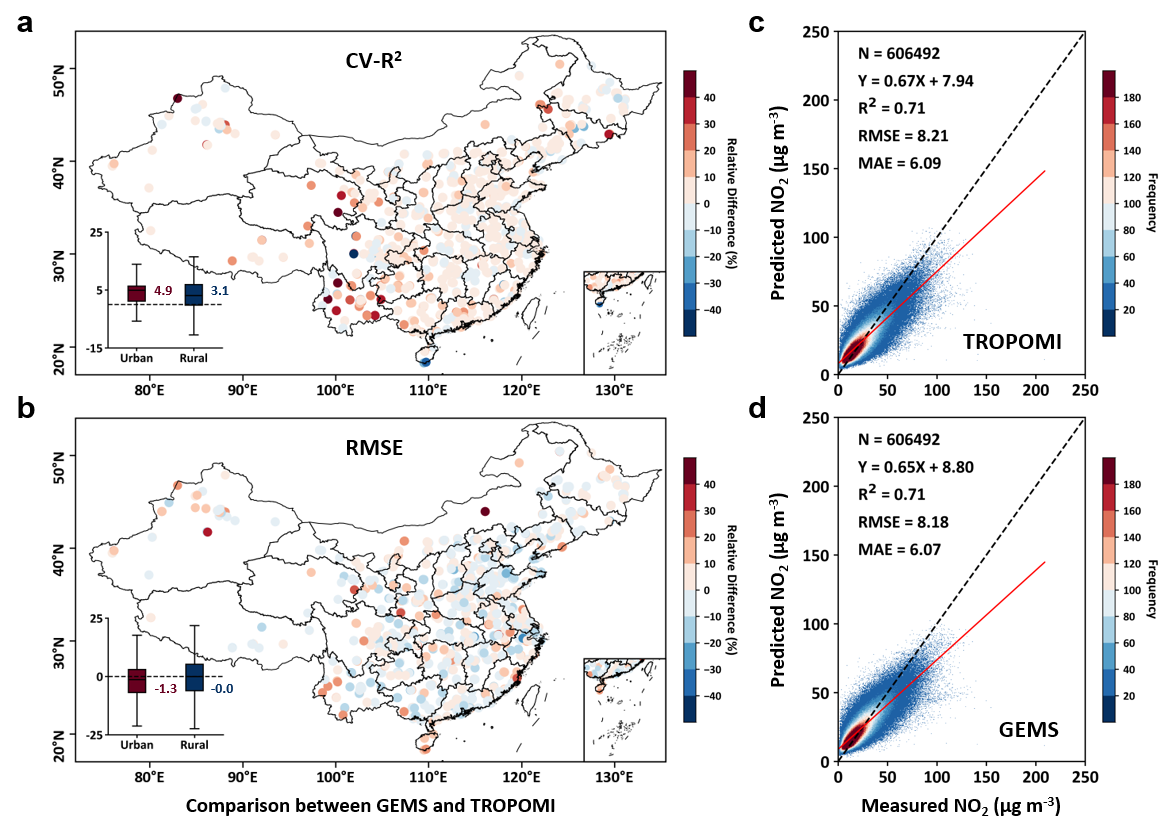


# Fig. S6 | Accuracy comparison of daily NO2 predictions from GEMS and TROPOMI. Spatial improvements (%) in (a) cross-validated coefficient of determination (CV-R2) and (b) root mean square error (RMSE) at each monitoring station across China in 2023, comparing GEMS- and TROPOMI-derived daily ambient NO2 predictions using the city-based 10-fold cross-validation approach. Inset box plots illustrate the improvements in urban and rural areas, with colored numbers indicating the mean relative differences. Panels (c) and (d) show comparisons between predicted and measured daily ambient NO2 concentrations (µg m-3) derived from (c) TROPOMI and (d) GEMS observations across all monitoring stations in China.


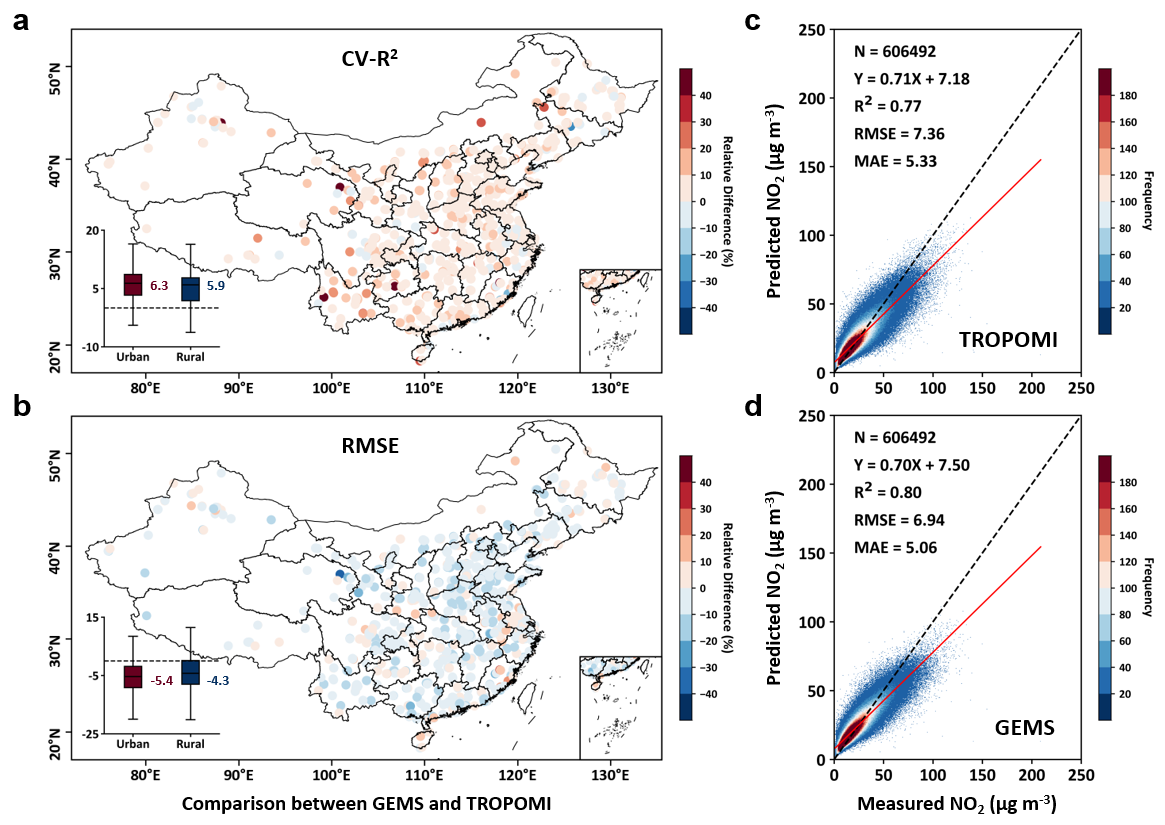


# Fig. S7 | Accuracy comparison of daily NO2 predictions from GEMS and TROPOMI. Spatial improvements (%) in (a) cross-validated coefficient of determination (CV-R2) and (b) root mean square error (RMSE) at each monitoring station across China in 2023, comparing GEMS- and TROPOMI-derived daily ambient NO2 predictions using the day-based 10-fold cross-validation approach. Inset box plots illustrate the improvements in urban and rural areas, with colored numbers indicating the mean relative differences. Panels (c) and (d) show comparisons between predicted and measured daily ambient NO2 concentrations (µg m-3) derived from (c) TROPOMI and (d) GEMS observations across all monitoring stations in China.


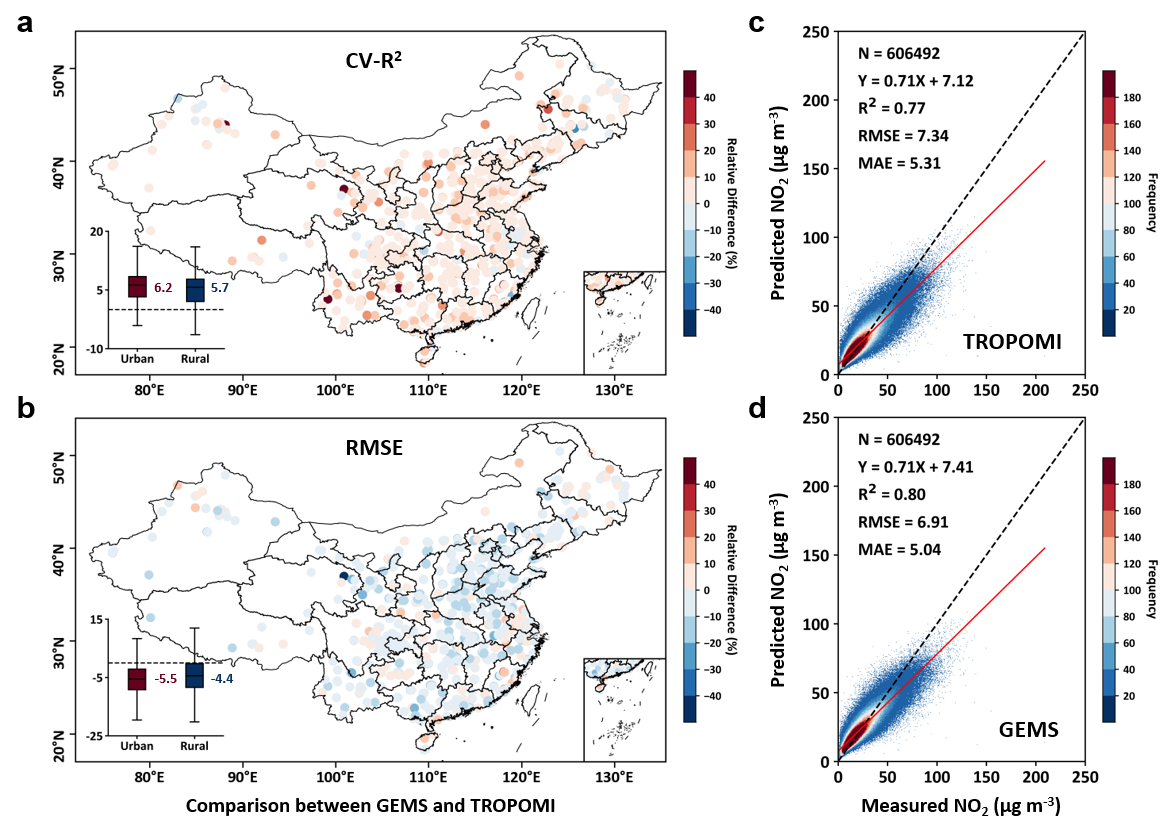


# Fig. S8 | Accuracy comparison of daily NO2 predictions from GEMS and TROPOMI. Spatial improvements (%) in (a) cross-validated coefficient of determination (CV-R2) and (b) root mean square error (RMSE) at each monitoring station across China in 2023, comparing GEMS- and TROPOMI-derived daily ambient NO2 predictions using the week-based 10-fold cross-validation approach. Inset box plots illustrate the improvements in urban and rural areas, with colored numbers indicating the mean relative differences. Panels (c) and (d) show comparisons between predicted and measured daily ambient NO2 concentrations (µg m-3) derived from (c) TROPOMI and (d) GEMS observations across all monitoring stations in China.


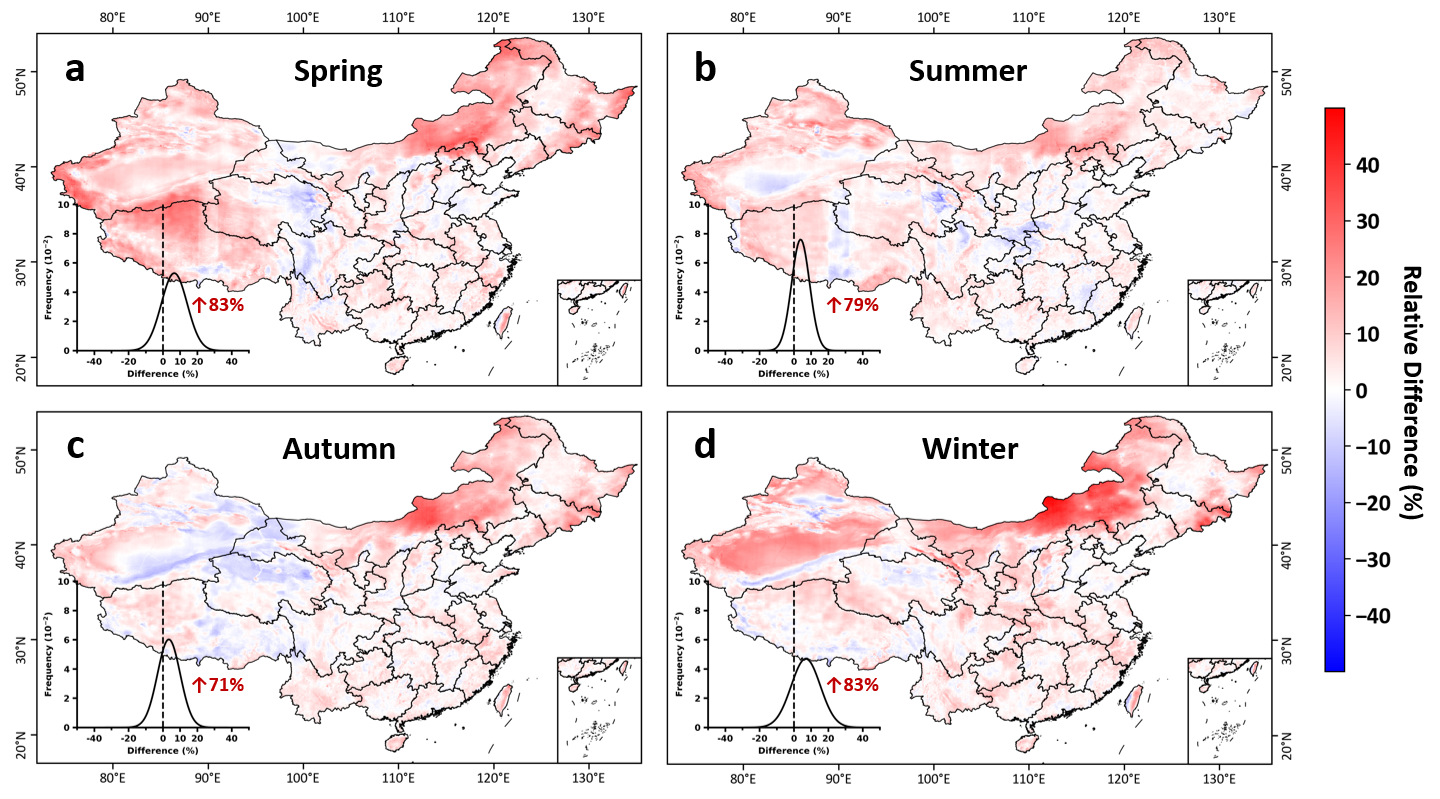


# Fig. S9 | Disparities in seasonal ambient NO2 concentrations in China. Spatial distributions of the relative differences (%) between GEMS- and TROPOMI-derived ambient NO2 concentrations for the four seasons: (a) spring, (b) summer, (c) autumn, and (d) winter. Inset plots display frequency histograms, with red numbers indicating the percentage of pixels showing positive differences.


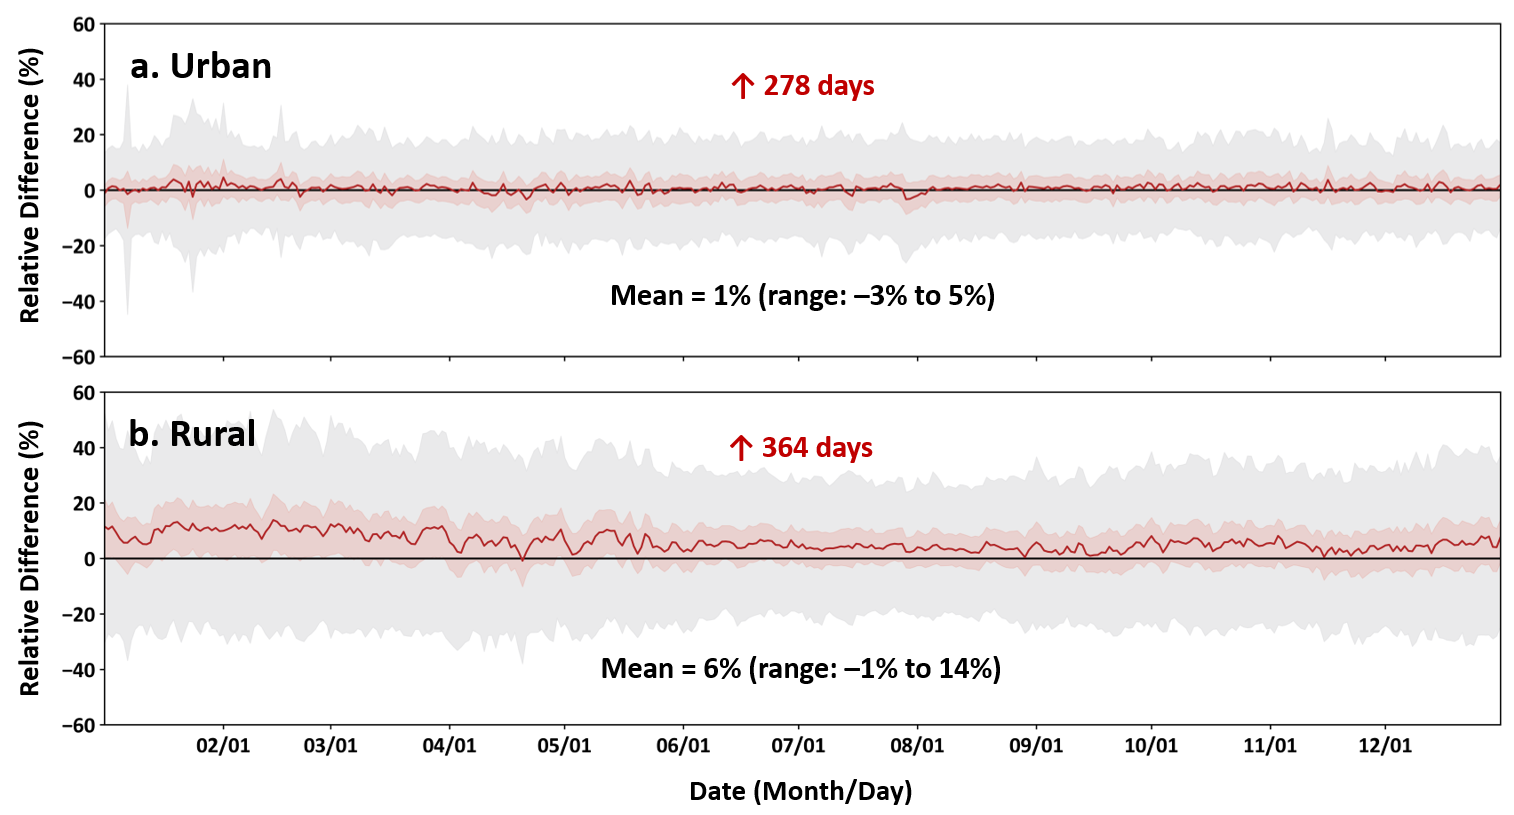


# Fig. S10 | Disparities in urban and rural ambient NO2 estimates in China. Time series of daily mean differences (µg m-3) in ambient NO2 concentrations derived from GEMS and TROPOMI in 2023 for (a) urban and (b) rural areas across China. Black numbers indicate the range and mean of the differences, while red numbers indicate the number of days with positive differences.


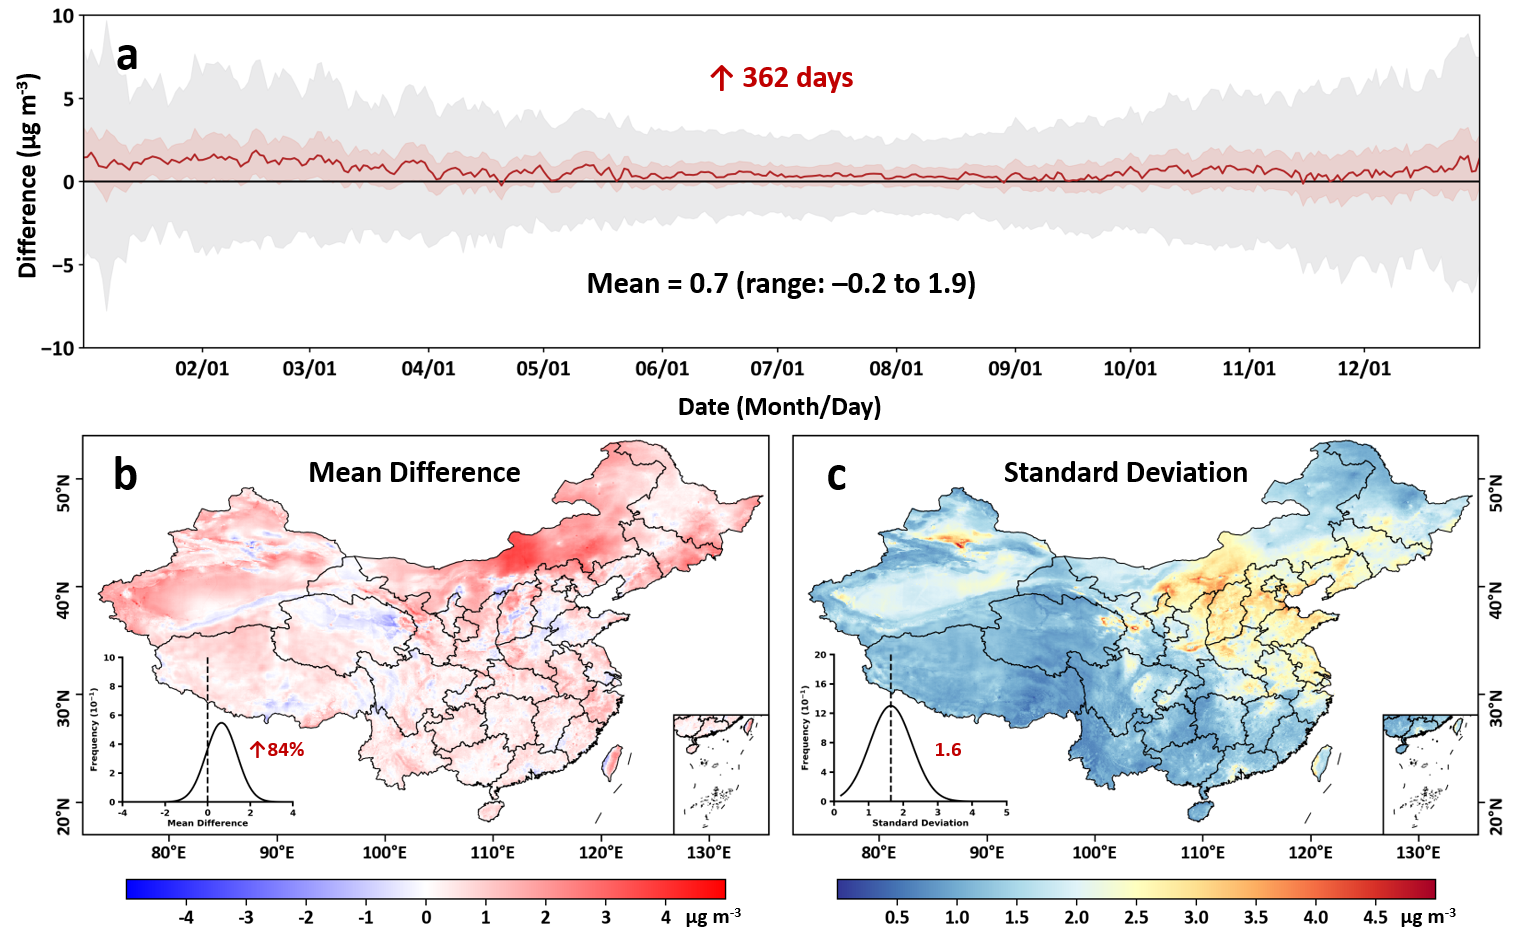


# Fig. S11 | Disparities in daily ambient NO2 concentrations in China. (a) Time series of daily differences (µg m-3) in ambient NO2 concentrations derived from GEMS and TROPOMI in 2023 in China, along with spatial distributions of (b) the mean difference (µg m-3) and (c) the standard deviation (µg m-3) between GEMS and TROPOMI-derived daily NO2 concentrations. Black numbers in (a) indicate the range and mean of the differences. Inset plots in (b) and (c) show frequency histograms. Red numbers in (a) and (b) indicate the number of days and percentage of pixels with positive differences, and in (c), the mean standard deviation, respectively.


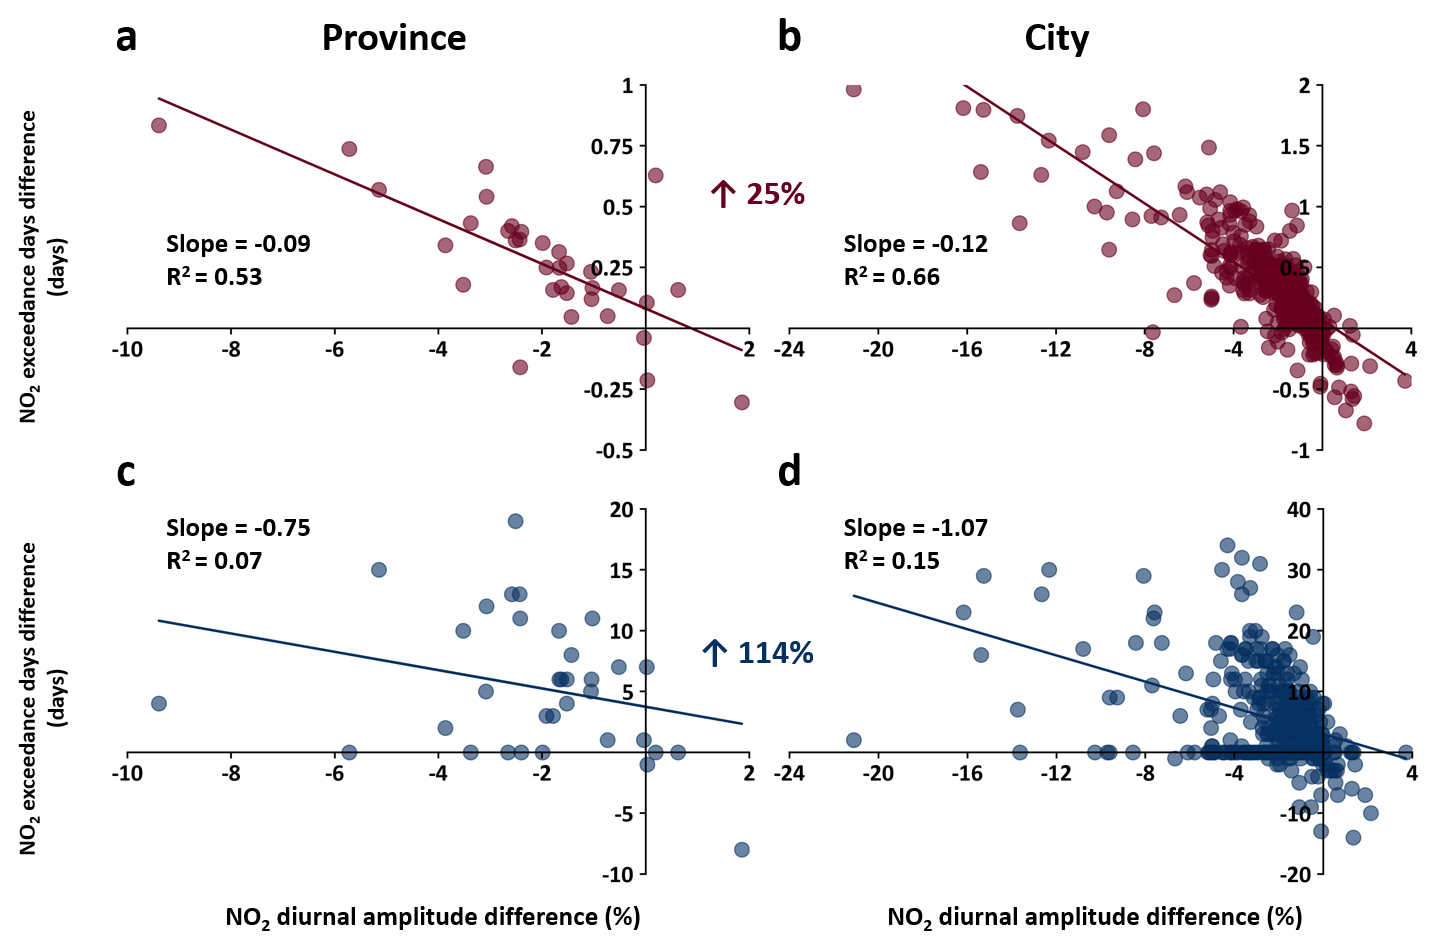


# Fig. S12 | Enhanced disparities between NO2 exposure and diurnal amplitude across spatial scales. Scatter plots show the relationship between the NO2 diurnal amplitude difference (%) and the difference in (a-b) daily population-weighted mean NO2 concentrations (µg m-3) and (c-d) the number of days exceeding the WHO air quality guideline of 25 µg m-3, as derived from GEMS and TROPOMI, comparing provincial (left) and city-level (right) scales. Colored values indicate the relative change in correlation (R2) between the two scales.


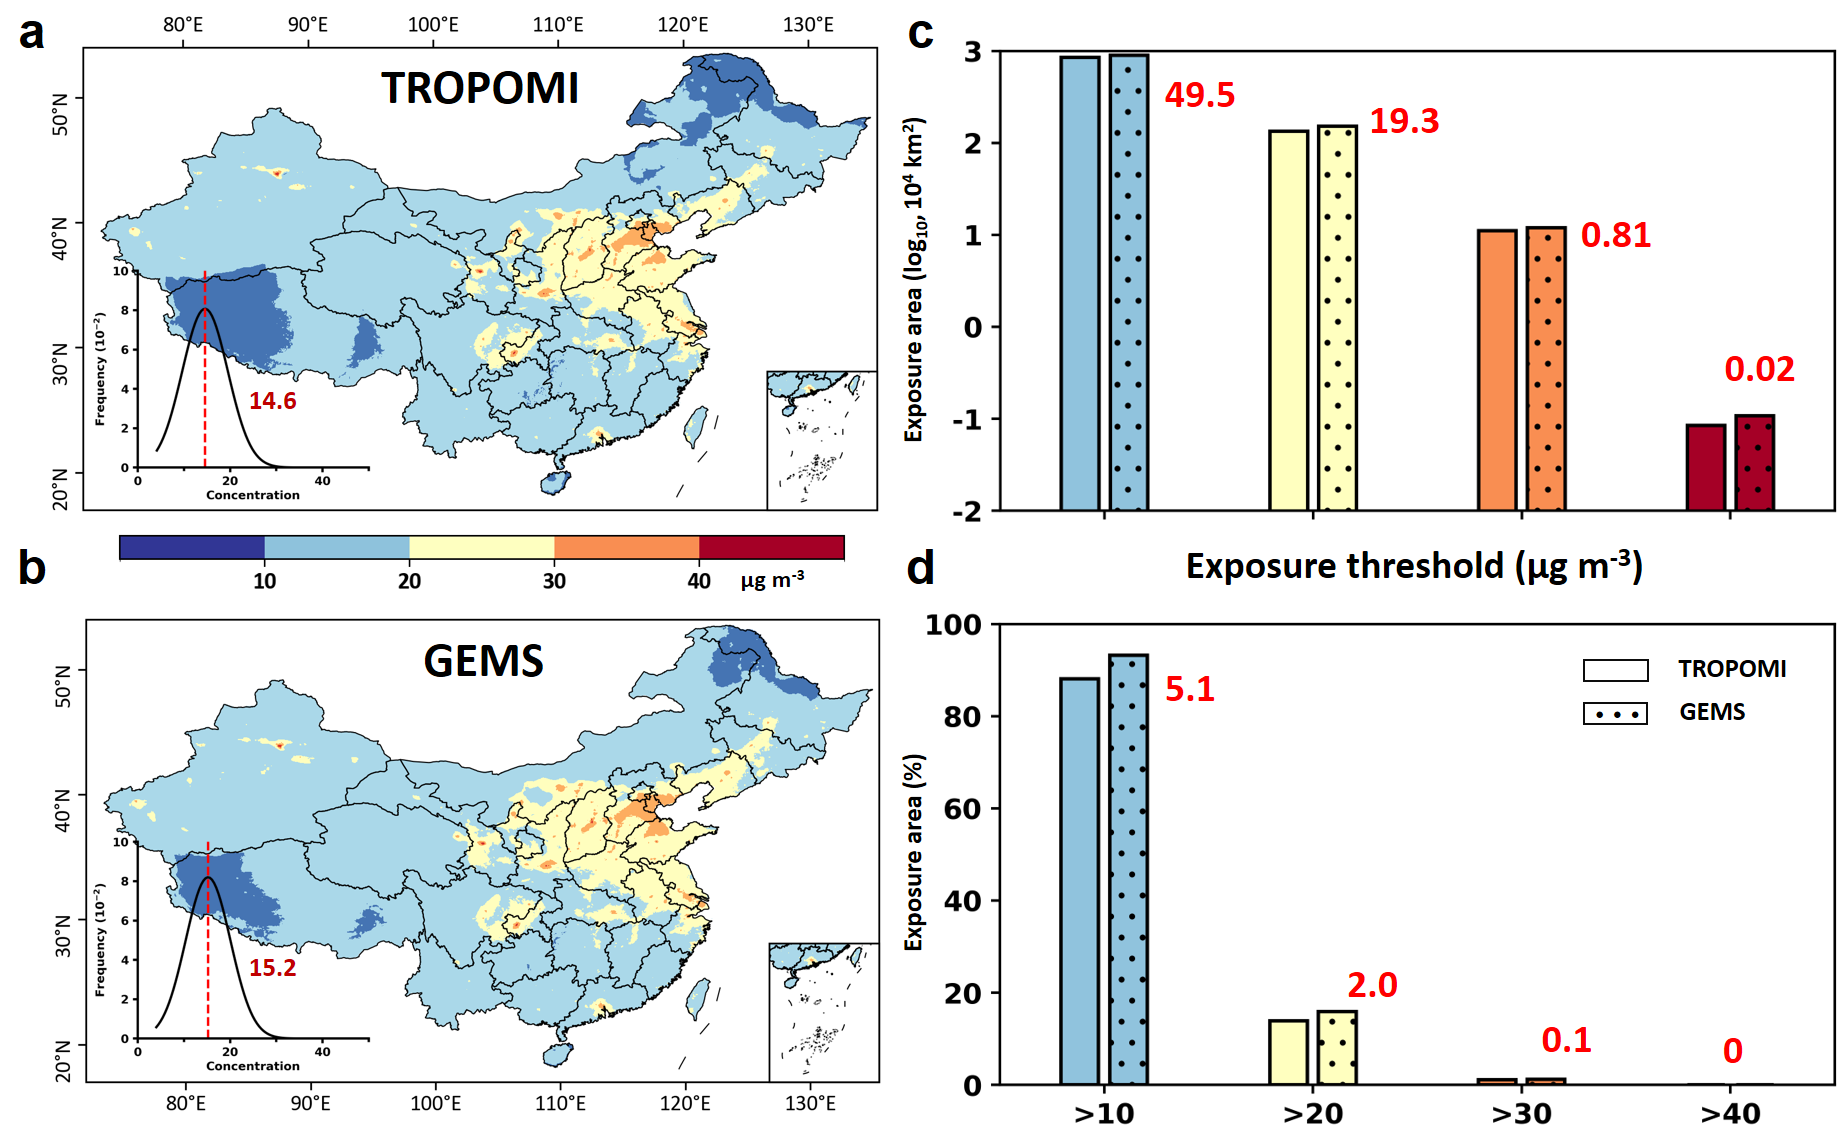


# Fig. S13 | Disparities in estimated exposure risk areas in China. Spatial distribution of Spatial distribution of areas exceeding the WHO’s recommended annual thresholds (IT-1, IT-2, IT-3, and AQG at 40, 30, 20, and 10 µg m-3), derived from (a) TROPOMI and (b) GEMS observations, as well as the histogram statistics show (c) the area and (d) the percentage of regions exceeding each threshold, with red numbers indicating the differences between the two datasets.


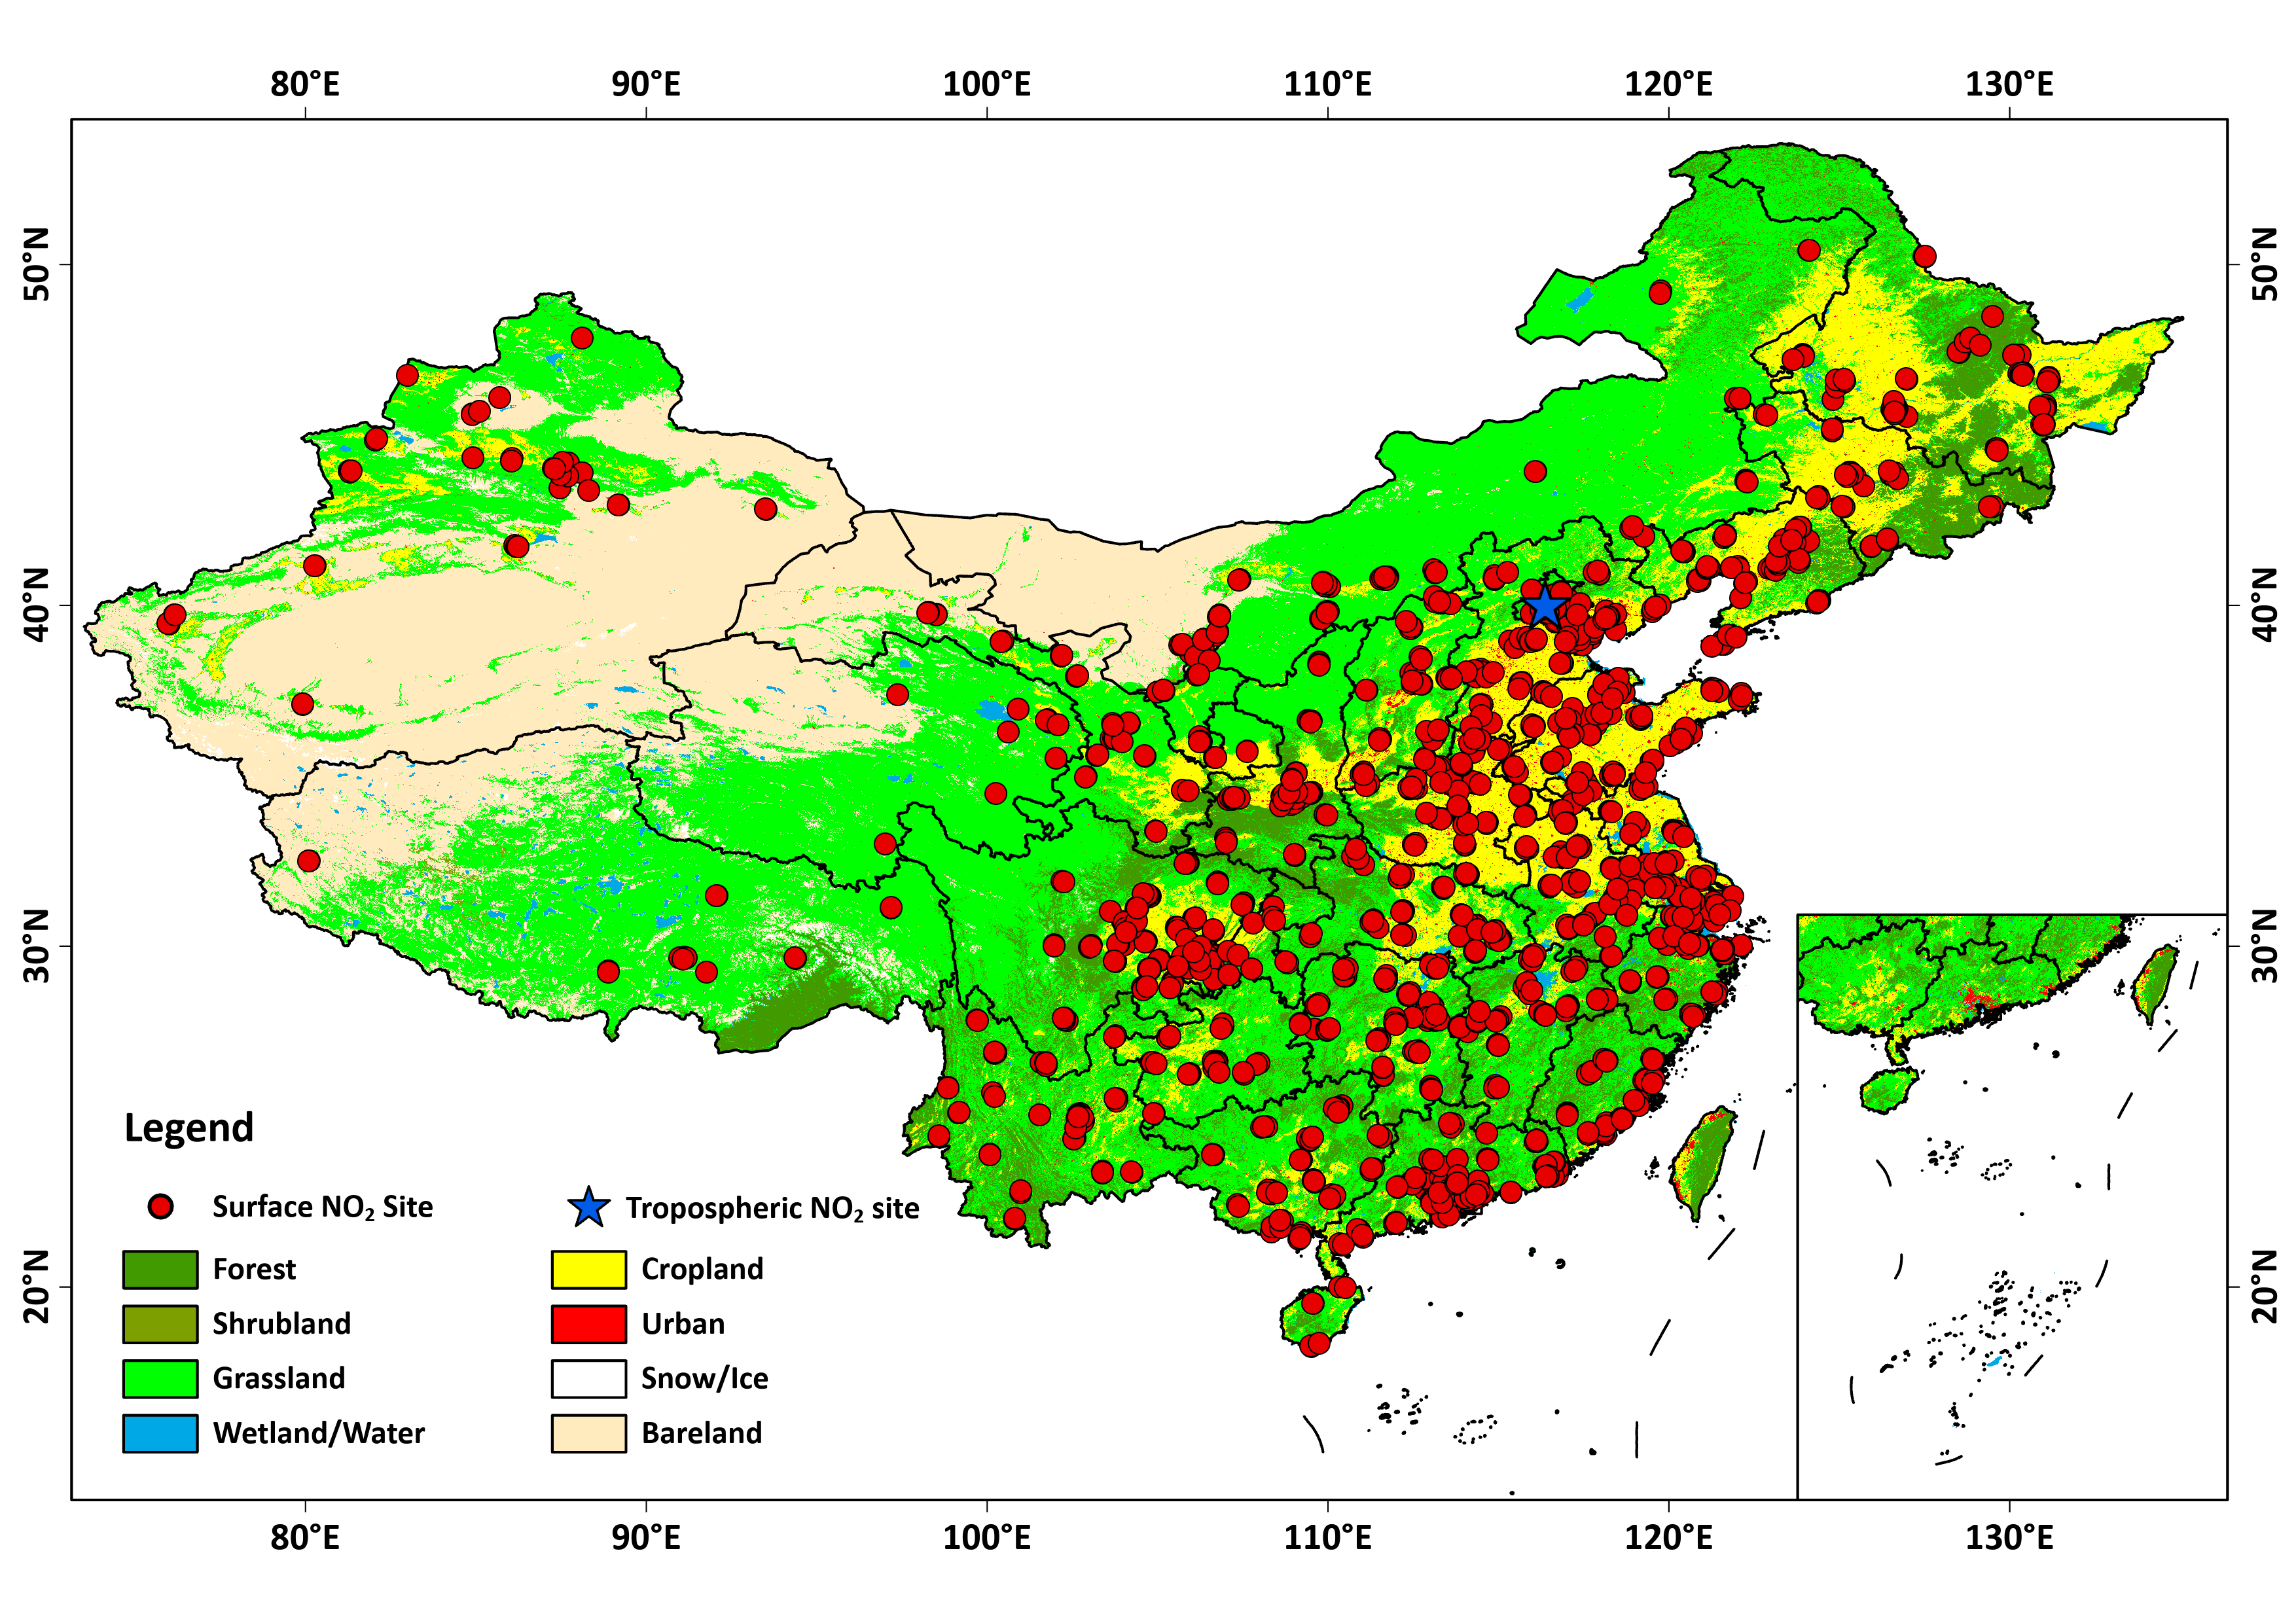


# Fig. S14 | Locations of ambient NO2 monitoring stations. Spatial distribution of ground-based surface NO2 (red dots) and tropospheric NO2 (blue stars) ground-based monitoring stations. The background map is the MODIS land-use cover product.


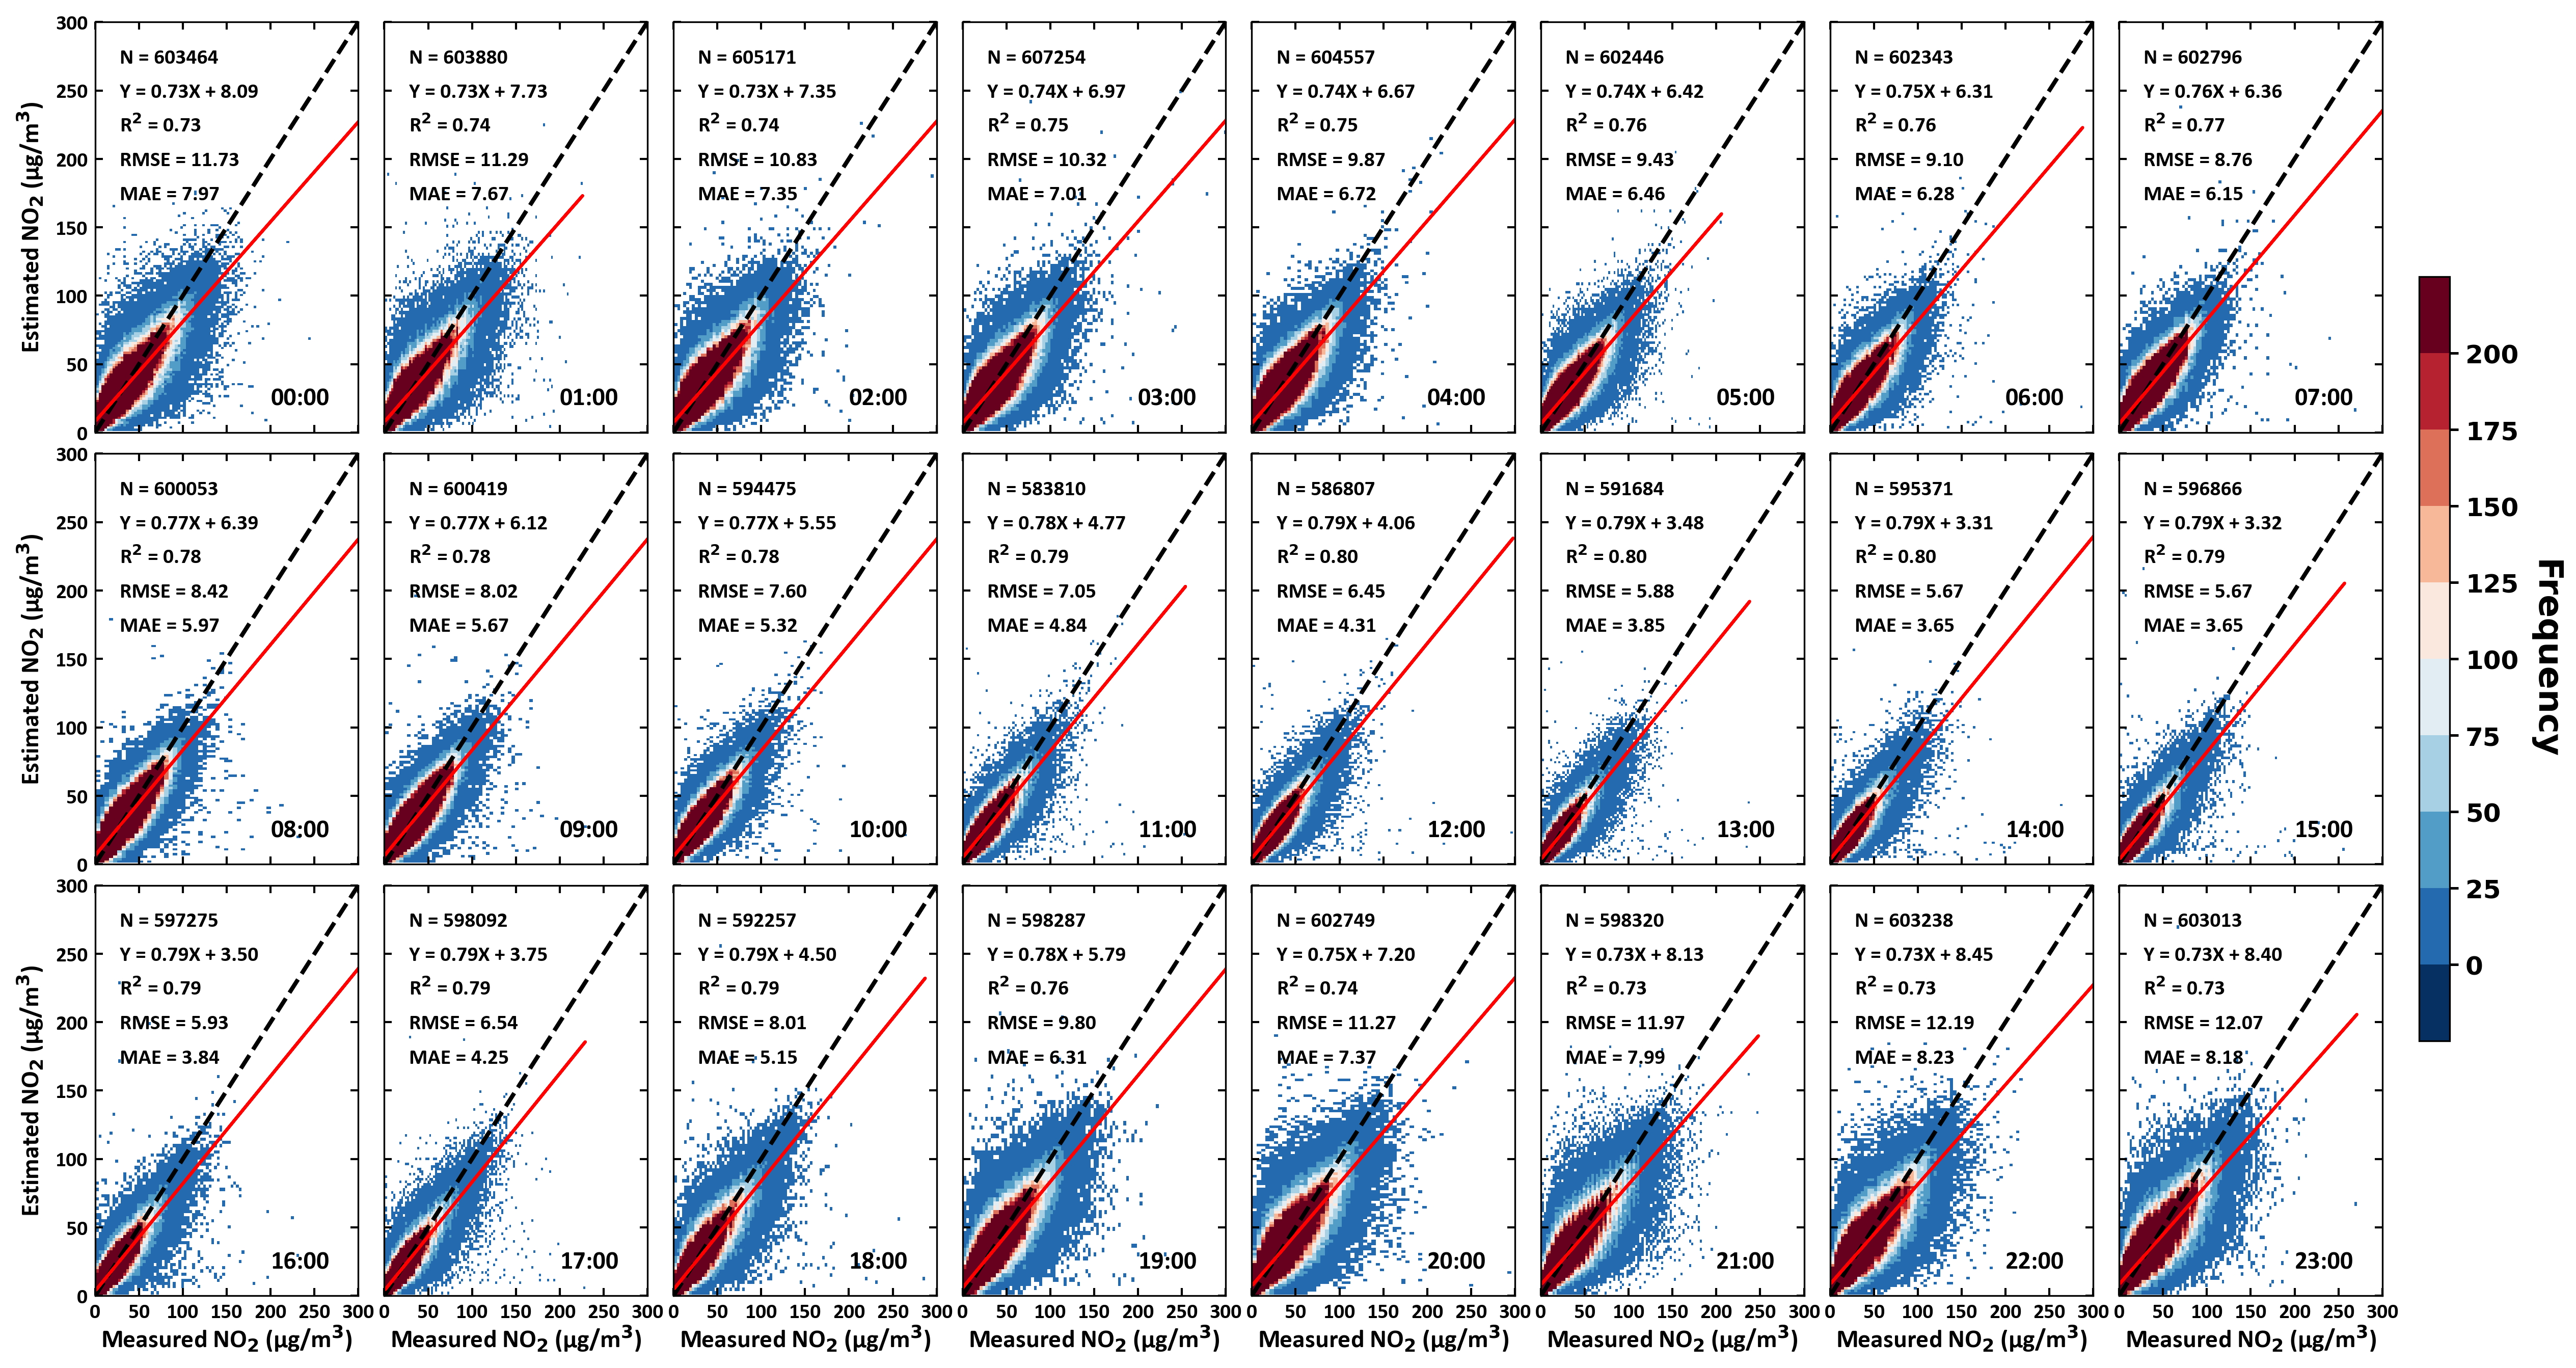


# Fig. S15 | Overall accuracy of hourly NO2 estimates across China. Validation of hourly NO₂ estimates (µg m-3) from 00:00 to 23:00 local time for the year 2023 in China, using the sample-based 10-fold cross-validation approach. Black dashed lines denote 1:1 lines, and red solid lines denote best-fit lines from linear regression. The sample size (N), linear regression equation, coefficient of determination (CV-R2), root-mean-square error (RMSE, µg m-3), and mean absolute error (MAE, µg m-3) are also given.


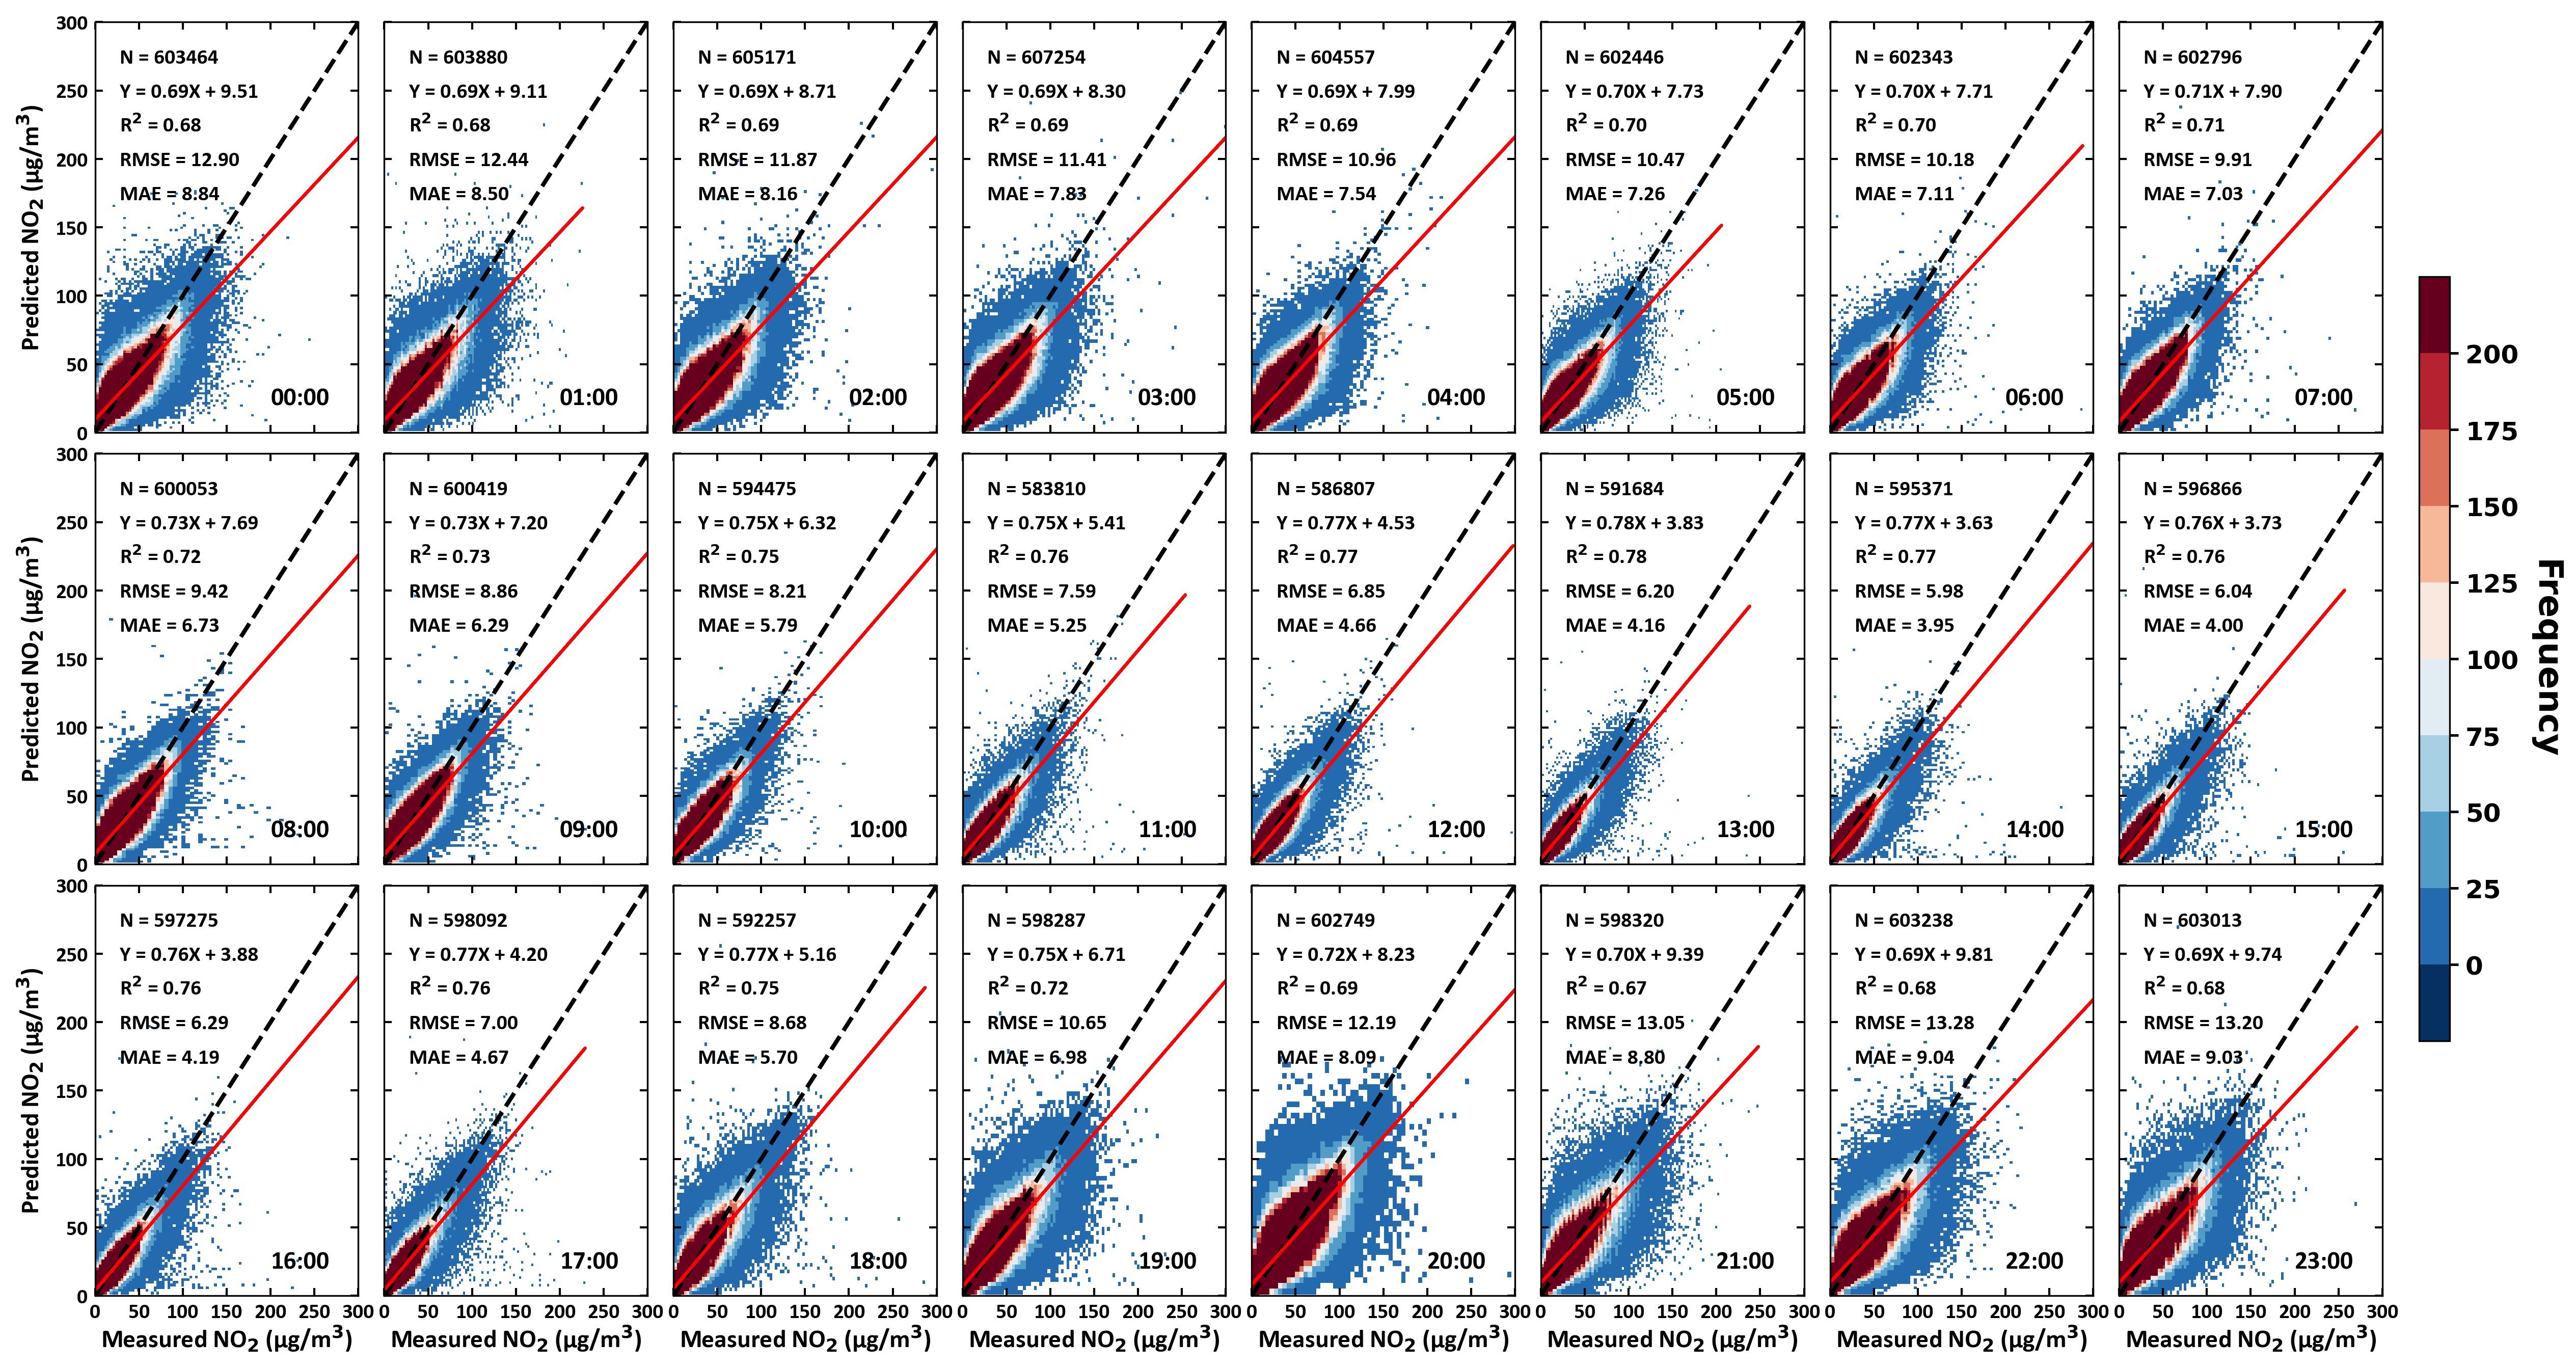


# Fig. S16 | Spatial accuracy of hourly NO2 predictions across China. Validation of ambient NO2 predictions (µg m-3) from 00:00 to 23:00 local time for the year 2023 in China, using the station-based 10-fold cross-validation approach. Black dashed lines denote 1:1 lines, and red solid lines denote best-fit lines from linear regression. The sample size (N), linear regression equation, coefficient of determination (CV-R2), root-mean-square error (RMSE, µg m-3), and mean absolute error (MAE, µg m-3) are also given.


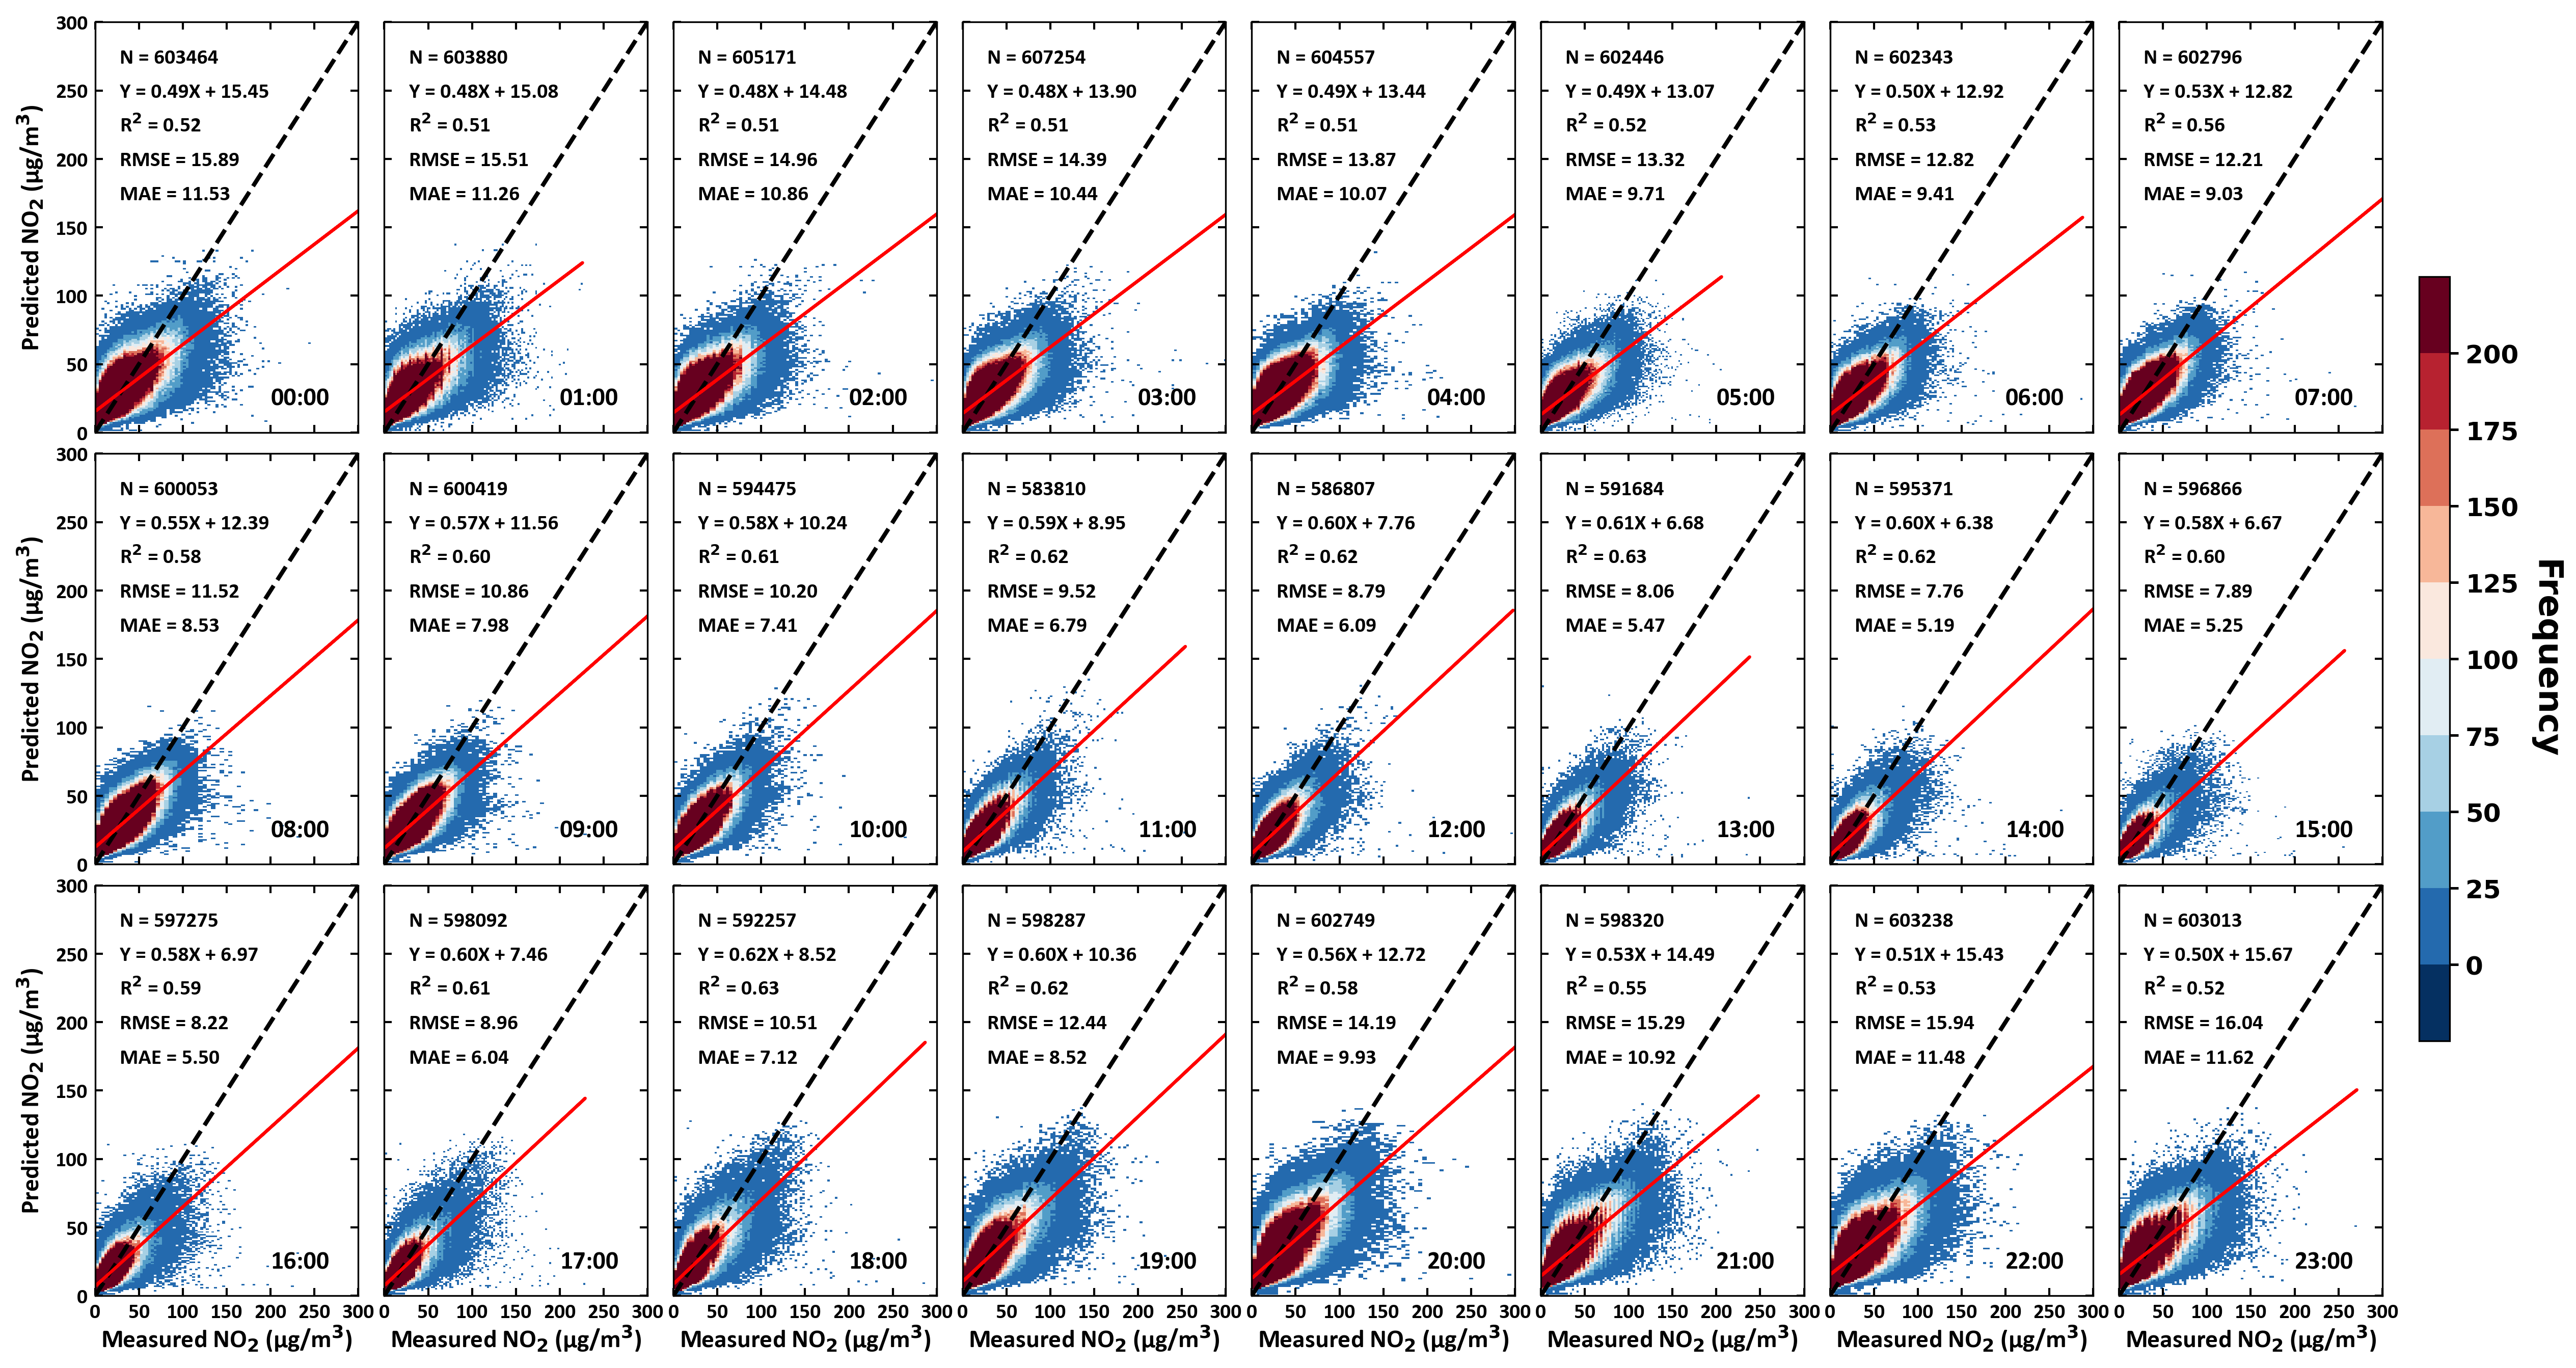


# Fig. S17 | Spatial accuracy of hourly NO2 predictions in China. Validation of hourly ambient NO2 predictions (µg m-3) from 00:00 to 23:00 local time for the year 2023 in China, using the city-based 10-fold cross-validation approach. Black dashed lines denote 1:1 lines, and red solid lines denote best-fit lines from linear regression. The sample size (N), linear regression equation, coefficient of determination (CV-R2), root-mean-square error (RMSE, µg m-3), and mean absolute error (MAE, µg m-3) are also given.


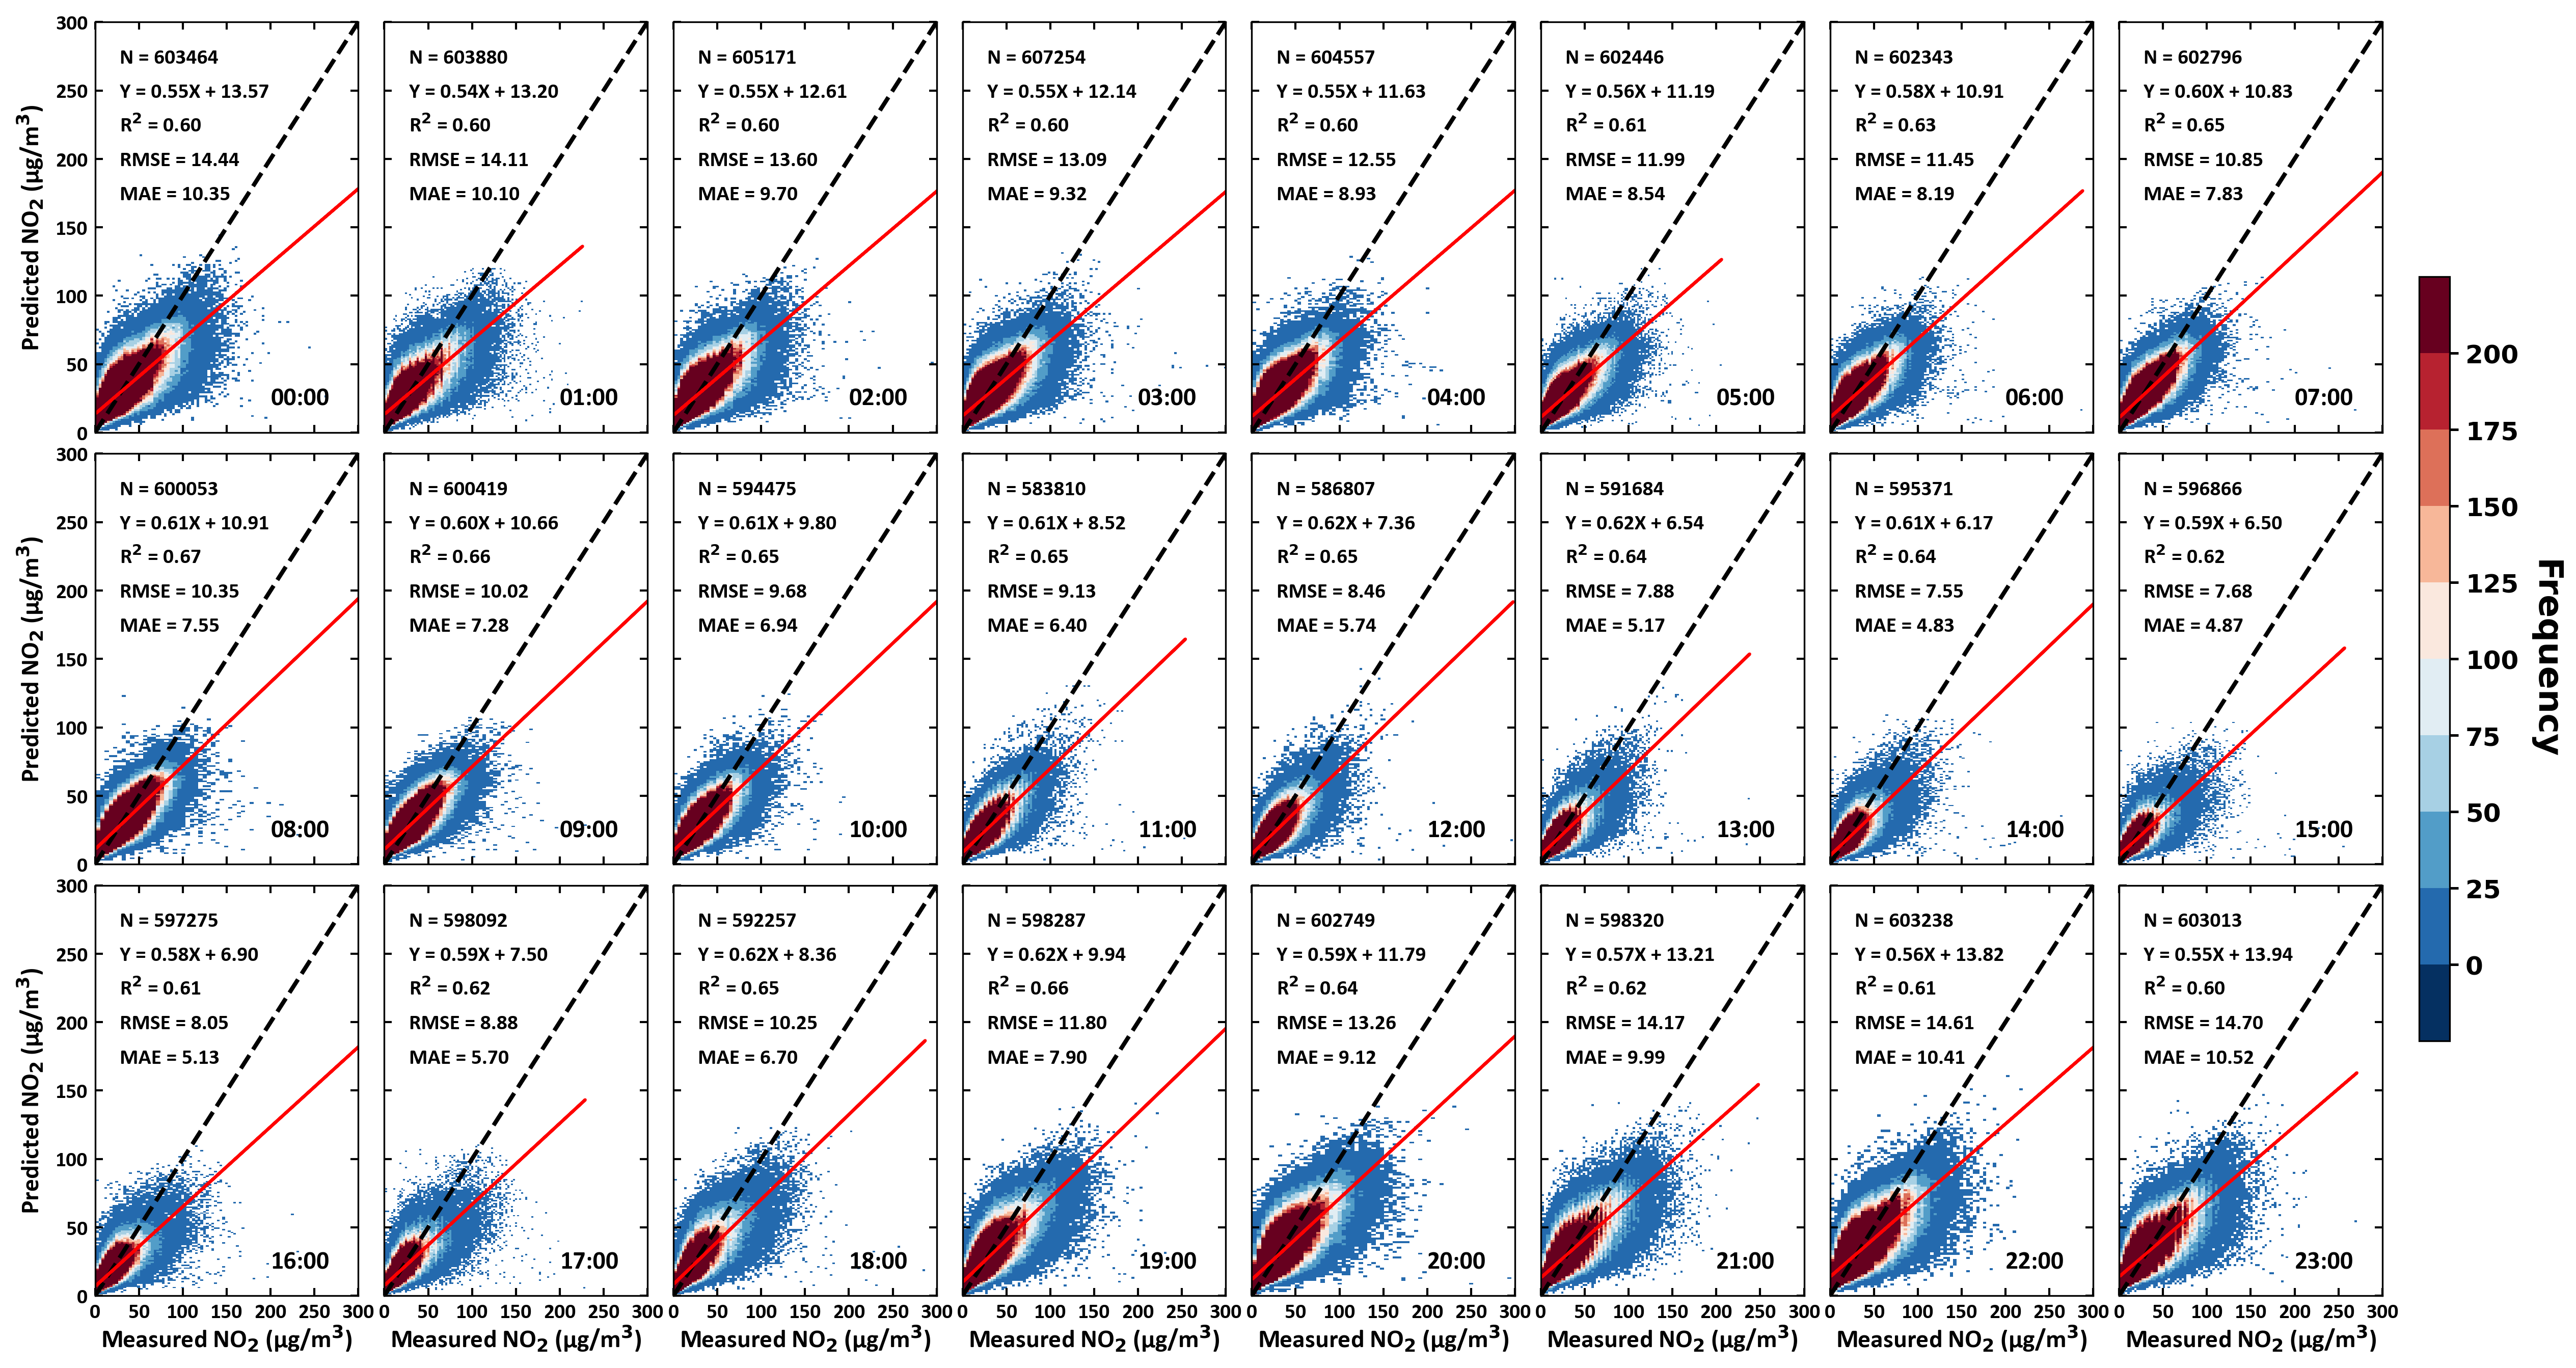


# Fig. S18 | Temporal accuracy of hourly NO2 predictions in China. Validation of hourly ambient NO2 predictions (µg m-3) from 00:00 to 23:00 local time for the year 2023 in China, using the day-based 10-fold cross-validation approach. Black dashed lines denote 1:1 lines, and red solid lines denote best-fit lines from linear regression. The sample size (N), linear regression equation, coefficient of determination (CV-R2), root-mean-square error (RMSE, µg m-3), and mean absolute error (MAE, µg m-3) are also given.


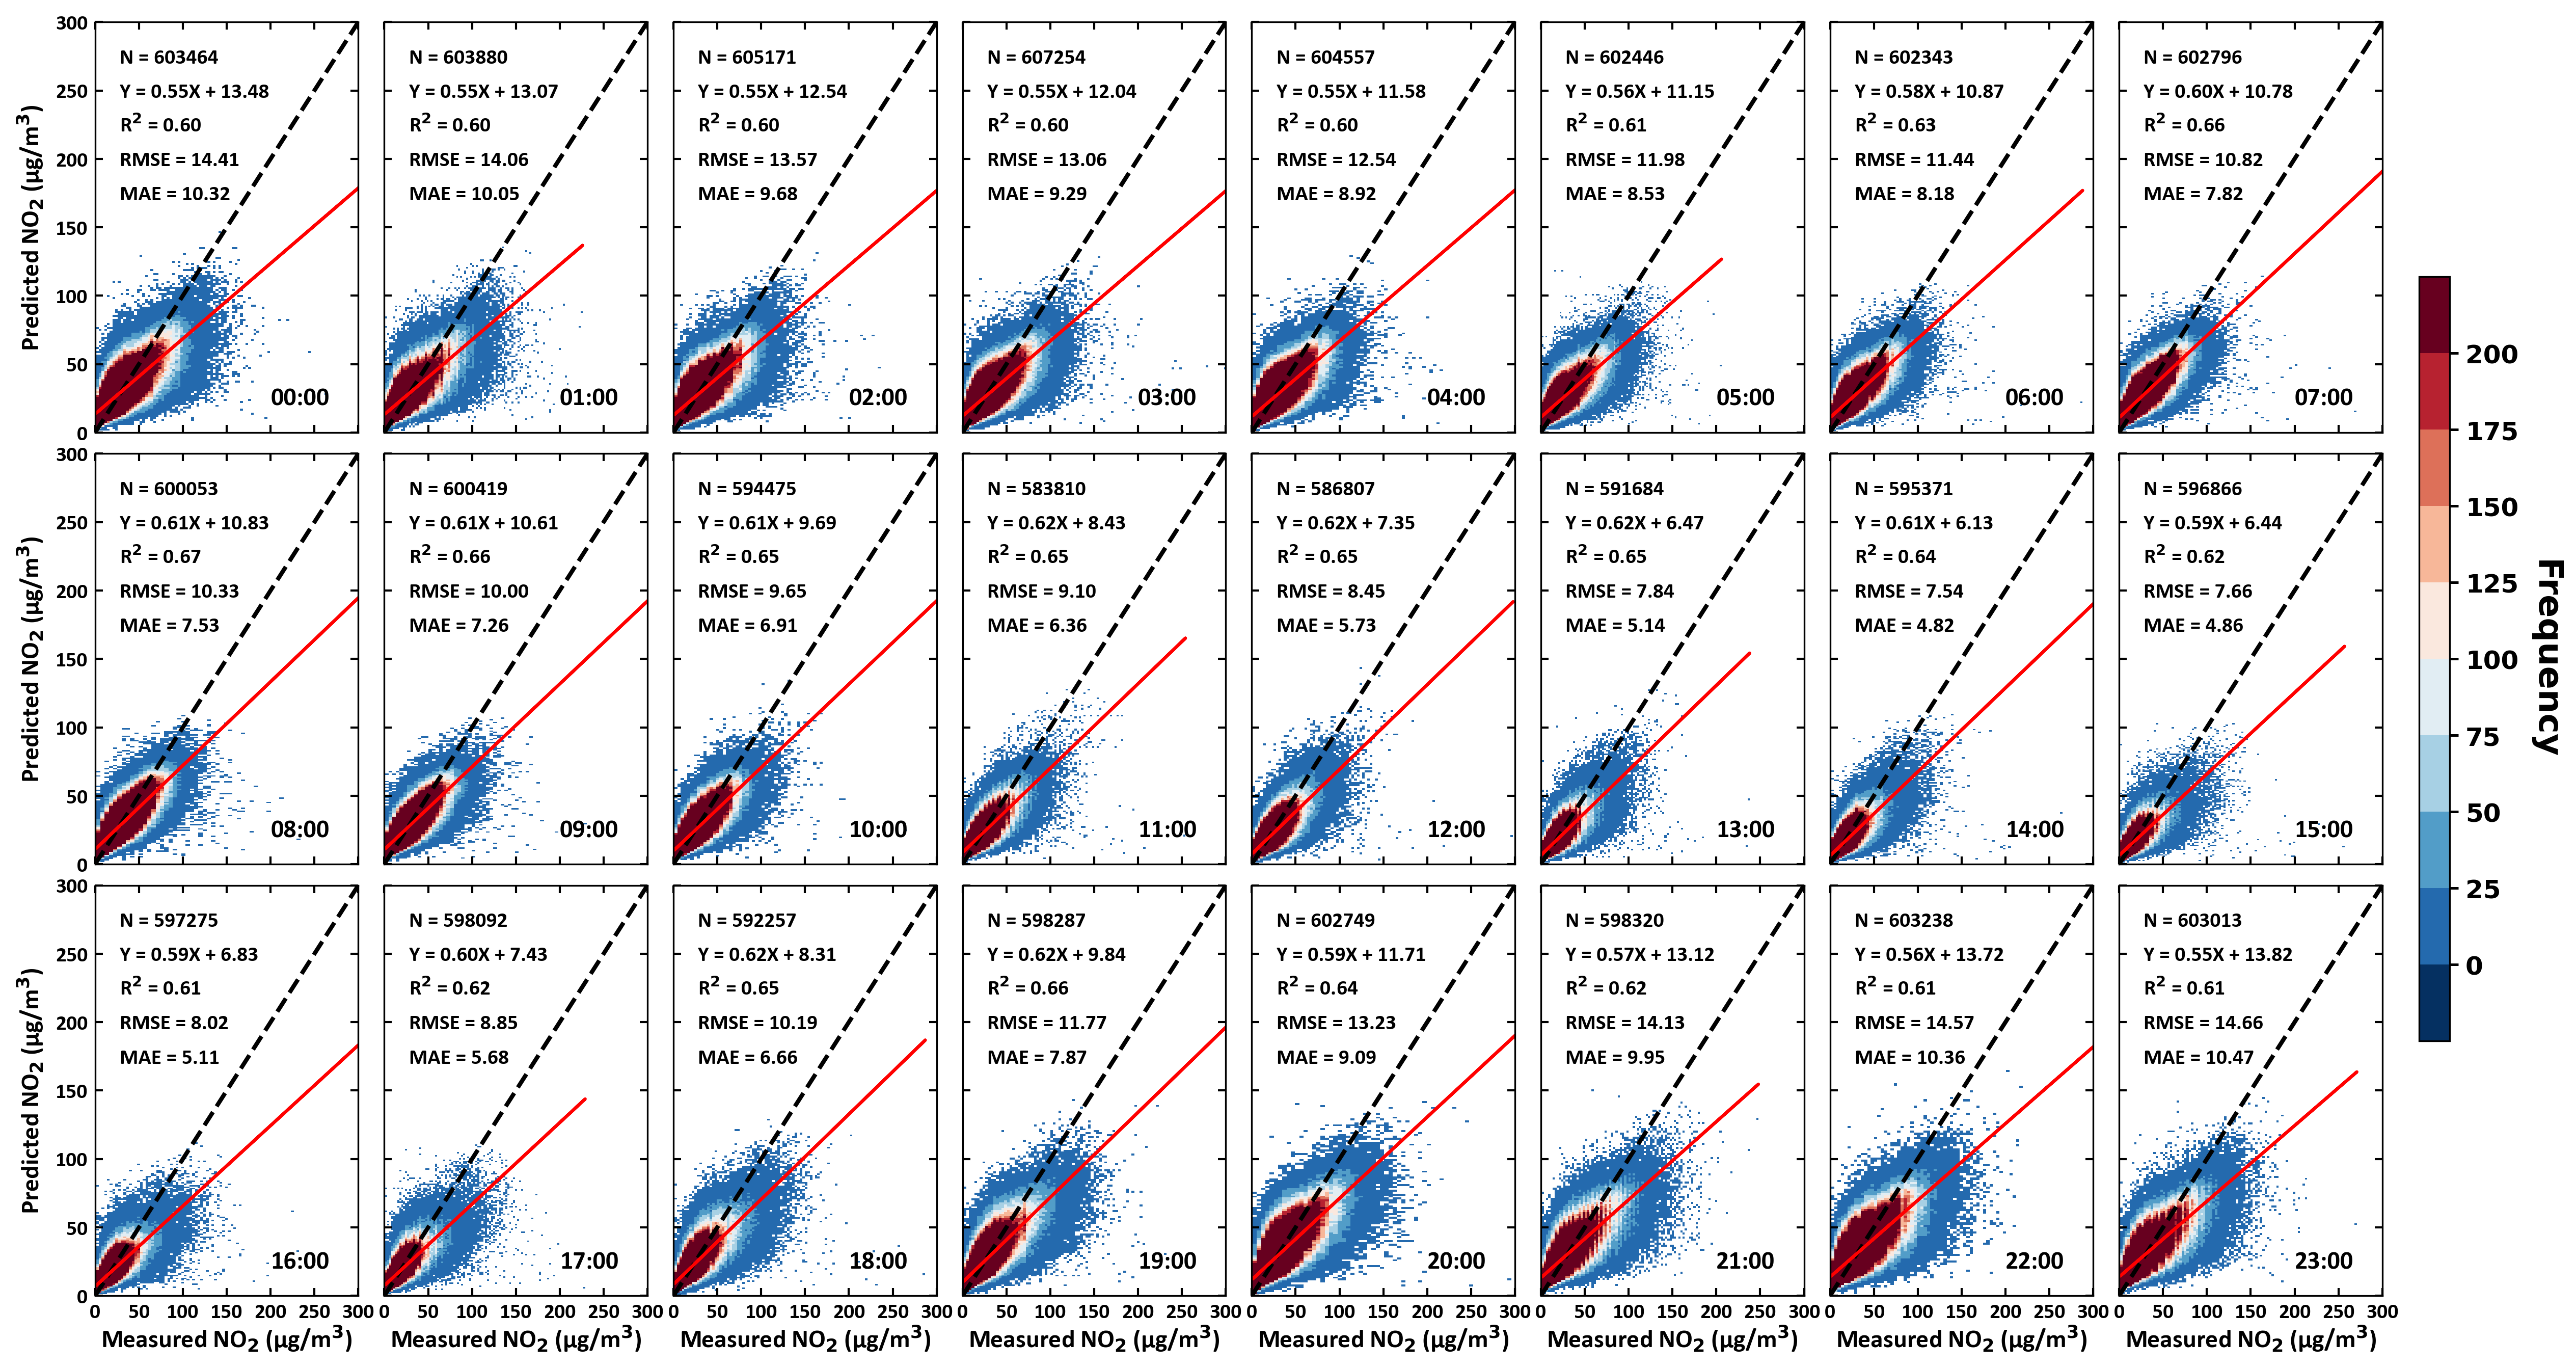


# Fig. S19 | Temporal accuracy of hourly ambient NO2 predictions in China. Validation of hourly ambient NO2 predictions (µg m-3) from 00:00 to 23:00 local time for the year 2023 in China, using the week-based 10-fold cross-validation approach. Black dashed lines denote 1:1 lines, and red solid lines denote best-fit lines from linear regression. The sample size (N), linear regression equation, coefficient of determination (CV-R2), root-mean-square error (RMSE, µg m-3), and mean absolute error (MAE, µg m-3) are also given.

#

# Table S1. Top 10 provinces in China with the largest disparities in acute mortality (in people) attributable to daily ambient NO2 pollution, derived from GEMS and TROPOMI observations in 2023.

| **Province** | **GEMS** | **TROPOMI** | **Disparity** |
| --- | --- | --- | --- |
| Deaths (95% CI) | Deaths (95% CI) | Deaths (95% CI) |
| **Anhui** | 5,716 (4,694–6,734) | 5,509 (4,524–6,490) | 207 (171–244) |
| **Henan** | 9,575 (7,863–11,279) | 9,427 (7,742–11,104) | 148 (122–174) |
| **Hubei** | 4,753 (3,903–5,599) | 4,616 (3,791–5,438) | 137 (112–161) |
| **Zhejiang** | 5,256 (4,317–6,191) | 5,123 (4,207–6,034) | 133 (109–157) |
| **Inner Mongolia** | 2,018 (1,657–2,378) | 1,887 (1,550–2,223) | 131 (108–155) |
| **Yunnan** | 1,814 (1,488–2,139) | 1,696 (1,391–1,999) | 118 (97–139) |
| **Gansu** | 2,292 (1,882–2,700) | 2,186 (1,795–2,575) | 106 (87–125) |
| **Hunan** | 3,422 (2,809–4,033) | 3,320 (2,725–3,913) | 102 (81–120) |
| **Xinjiang** | 1,972 (1,620–2,323) | 1,873 (1,539–2,206) | 99 (82–117) |
| **Jilin** | 2,188 (1,797–2,579) | 2,089 (1,715–2,462) | 99 (81–117) |

# Table S2. Top 10 provinces in China with the largest disparities in chronic mortality (in people) attributable to annual ambient NO2 pollution, derived from GEMS and TROPOMI observations in 2023.

| **Province** | **GEMS** | **TROPOMI** | **Disparity** |
| --- | --- | --- | --- |
| Deaths (95% CI) | Deaths (95% CI) | Deaths (95% CI) |
| **Anhui** | 28,003 (7,256–41,041) | 26,910 (6,968–39,455) | 1,093 (288–1,585) |
| **Henan** | 47,223 (12,253–69,143) | 46,440 (12,049–68,004) | 782 (205–1,139) |
| **Hubei** | 23,000 (5,956–33,720) | 22,269 (5,766–32,654) | 731 (191–1,066) |
| **Inner Mongolia** | 9,655 (2,506–14,135) | 8,944 (2,323–13,088) | 711 (183–1,046) |
| **Zhejiang** | 25,898 (6,729–37,888) | 25,199 (6,545–36,873) | 699 (184–1,015) |
| **Yunnan** | 7,817 (2,001–11,548) | 7,184 (1,838–10,616) | 633 (163–932) |
| **Gansu** | 11,148 (2,897–16,309) | 10,585 (2,750–15,488) | 563 (147–821) |
| **Hunan** | 15,551 (3,994–22,920) | 14,988 (3,849–22,093) | 563 (145–826) |
| **Xinjiang** | 9,596 (2,502–14,009) | 9,062 (2,364–13,224) | 534 (138–784) |
| **Jilin** | 10,583 (2,736–15,535) | 10,057 (2,598–14,767) | 527 (137–769) |

# Table S3. Top 10 provinces in China with the largest disparities in asthma mortality (in people) attributable to annual ambient NO2 pollution, derived from GEMS and TROPOMI observations in 2023.

| **Province** | **GEMS** | **TROPOMI** | **Disparity** |
| --- | --- | --- | --- |
| DALYs (95% CI) | DALYs (95% CI) | DALYs (95% CI) |
| **Anhui** | 1,761 (232–3,175) | 1,676 (221–3,027) | 84 (11–148) |
| **Henan** | 3,029 (401–5,443) | 2,968 (393–5,335) | 61 (8–108) |
| **Hubei** | 1,390 (183–2,507) | 1,333 (176–2,405) | 57 (8–102) |
| **Zhejiang** | 1,663 (221–2,978) | 1,609 (214–2,883) | 54 (7–95) |
| **Yunnan** | 299 (38–554) | 252 (32–467) | 47 (6–87) |
| **Inner Mongolia** | 580 (77–1,039) | 533 (71–953) | 47 (6–86) |
| **Gansu** | 688 (92–1,231) | 644 (86–1,152) | 44 (6–78) |
| **Xinjiang** | 595 (80–1,055) | 553 (75–978) | 42 (5–77) |
| **Hunan** | 779 (101–1,433) | 738 (95–1,357) | 42 (5–76) |
| **Jilin** | 637 (84–1,155) | 596 (78–1082) | 41 (5–74) |

# Table S4. Comparison of model performance in estimating hourly surface NO2 concentrations in China from previous studies.

| Model | Satellites | Duration | Spatial  Resolution | Overall accuracy | | | Gap filling | Region | Literature |
| --- | --- | --- | --- | --- | --- | --- | --- | --- | --- |
| CV-R2 | RMSE | MAE |
| XGBoost | Himawari-8 | 08:00-16:00 | 5 km | 0.81 | 9.7 | – | No | BTH | Liu and Chen, 2022 |
| XGBoost | GEMS | 08:00-15:00 | 5 km | 0.73–0.93 | 4.19–8.06 | – | Yes | Eastern China | Ahmad et al., 2024 |
| CatBoost | GEMS | 07:00-16:00 | 5 km | 0.84 | 5.51 | 3.87 | No | China | He et al., 2024 |
| 2DCNN-LSTM | Himawari-8 | 09:00-16:00 | 5 km | 0.85 | 5.60 | – | No | China | Chen et al., 2023 |
| RF | GEMS | 07:00-16:00 | – | 0.87 | 6.68 | 4.57 | No | China | Yang et al., 2023 |
| **4D-STET** | **GEMS** | **00:00-23:00** | **5 km** | **0.77** | **9.18** | **6.01** | **Yes** | **China** | **Our study** |
|  |  | 08:00-20:00 | 5 km | 0.80 | 7.19 | 4.73 |  |  |
|  |  | 20:00-08:00 | 5 km | 0.74 | 10.79 | 7.28 |  |  |

2DCNN-LSTM: Two-Dimensional Convolutional Neural Network – Long Short-Term Memory.

# Table S5. Summary of satellite, ground, and auxiliary datasets used in this study.

| Category | Variable | Unit | Temporal Resolution | Spatial Resolution | Data Source |
| --- | --- | --- | --- | --- | --- |
| Ground truth | Surface NO2 | µg m-3 | 1 hour | In situ | MEE |
| Remote sensing NO2 products | Tropospheric NO2 | molec cm-2 | 1 hour | 3 km × 8 km | GEMS |
| Tropospheric NO2 | molec cm-2 | 1 day | 3.5 km × 5.5 km | TROPOMI |
| Chemical transport model | Surface NO2 | mg m-3 | 1 hour | 0.25° × 0.25° | GEOS-CF |
| Tropospheric NO2 | molec cm-2 | 1 hour | 0.25° × 0.25° | GEOS-CF |
| Meteorological data | Boundary layer height | m | 1 hour | 0.25° × 0.25° | ERA5 |
| Relative humidity | % | 1 hour |  |
| Surface pressure | hPa | 1 hour | 0.1° × 0.1° | ERA5-Land |
| Air temperature | K | 1 hour |  |
| Total precipitation | mm | 1 hour |  |
| V-component of wind | m s-1 | 1 hour |  |
| U-component of wind | m s-1 | 1 hour |  |
| Anthropogenic Emission | Nitrogen oxides (NOX) | Tg | 1 month | 0.1° × 0.1° | CAMS-GLOB-ANT |
| Auxiliary variable | NDVI | / | 1 month | 0.05° × 0.05° | MODIS |
| DEM | m | 1 year | 90 m | SRTM |
| Nighttime Light | nw cm-2 sr-1 | 1 month | 500 m | VIIRS |
| Population | people | 1 year | 1 km | LandScanTM |

MEE: Ministry of Ecology and Environment.

# Table S6. Validation statistics of hourly NO2 retrievals (μg m-3) for all-day, daytime, and nighttime periods in China. “All-day” refers to 00:00–24:00 CST, “daytime” to 08:00–20:00 CST, and “nighttime” to the remaining hours.

| Period | Sample-CV | | | Station-CV | | | City-CV | | |
| --- | --- | --- | --- | --- | --- | --- | --- | --- | --- |
| R2 | RMSE | MAE | R2 | RMSE | MAE | R2 | RMSE | MAE |
| All-day | 0.77 | 9.18 | 0.77 | 0.73 | 10.05 | 6.66 | 0.58 | 12.39 | 8.60 |
| Daytime | 0.80 | 7.19 | 0.80 | 0.77 | 7.78 | 5.19 | 0.64 | 9.66 | 6.65 |
| Nighttime | 0.74 | 10.79 | 0.74 | 0.69 | 11.88 | 8.10 | 0.53 | 14.58 | 10.52 |
| Period | Day-CV | | | Week-CV | | |  | | |
| R2 | RMSE | MAE | R2 | RMSE | MAE |  |  |  |
| All-day | 0.65 | 11.43 | 7.79 | 0.65 | 11.39 | 7.77 |  |  |  |
| Daytime | 0.67 | 9.19 | 6.17 | 0.68 | 9.16 | 6.14 |  |  |  |
| Nighttime | 0.62 | 13.27 | 9.41 | 0.62 | 13.24 | 9.38 |  |  |  |

# References:

Ahmad, N. *et al.* Estimation of ground-level NO2 and its spatiotemporal variations in China using GEMS measurements and a nested machine learning model. *Atmos. Chem. Phys.* 24, 9645–9665 (2024).

Chen, R. *et al.* The Spatiotemporal distribution of NO2 in China based on refined 2DCNN-LSTM model retrieval and factor interpretability analysis. ***Remote Sens.*** 15, 4261 (2023).

He, Q., Qin, K., Cohen, J. B., Li, D. & Kim, J. Quantifying Uncertainty in ML-derived atmosphere remote sensing: hourly surface NO2 estimation with GEMS. *Geophys. Res. Lett.* 51, e2024GL110468 (2024).

Liu, J. & Chen, W. First satellite-based regional hourly NO2 estimations using a space-time ensemble learning model: A case study for Beijing-Tianjin-Hebei Region, China. *Sci. Total Environ.* 820, 153289 (2022).

Yang, Q. *et al.* A synchronized estimation of hourly surface concentrations of six criteria air pollutants with GEMS data. *NPJ Clim. Atmos. Sci.* 6, 94 (2023).
